# Supplementary material for: Activation of old carbon by erosion of coastal and subsea permafrost in Arctic Siberia
Source: Springer Nature journal article supplement (doi:10.1038/nature11392), 2012-08-28
Supplement: 41586_2012_BFnature11392_MOESM346_ESM.pdf [file 41586_2012_BFnature11392_MOESM346_ESM.pdf]

## Contents

### Supplementary Figures S1-S5

Figure S1 consists of a schematic showing the main findings of the paper; Figure S2 shows the sampling locations; Figure S3 shows radiochronological sediment core data; Figure S4 and S5 show isotopic values for our defined end-members.

### Supplementary Methods

This contains detailed information on the sampling campaigns, bulk elemental and isotope analyses, and sediment flux calculations, followed by a thorough description of the end-members used for dual-carbon isotopic mixing model (including individual description of topsoil-PF, ICD-PF and marine end-members), and the Monte Carlo simulations. The Muostakh Island methods consist of a study area description, sampling description, elemental and isotopic carbon analysis, lipid extraction, fractionation and analysis, and analysis of CO<sub>2</sub> fluxes.

### Supplementary Tables S1-S10

Table S1 and S2 show a summary of bulk geochemical data and sediment flux data, respectively; Tables S3 and S4 contain the data that were used for the end-member values; Table S5 summarizes the relative contribution of the three defined sources; Table S6 summarizes the coastal and shelf carbon fluxes; Table S7 and S8 contains data from Muostakh Island; Tables S9 and S10 contain raw bulk geochemical and radiochronological data, respectively.

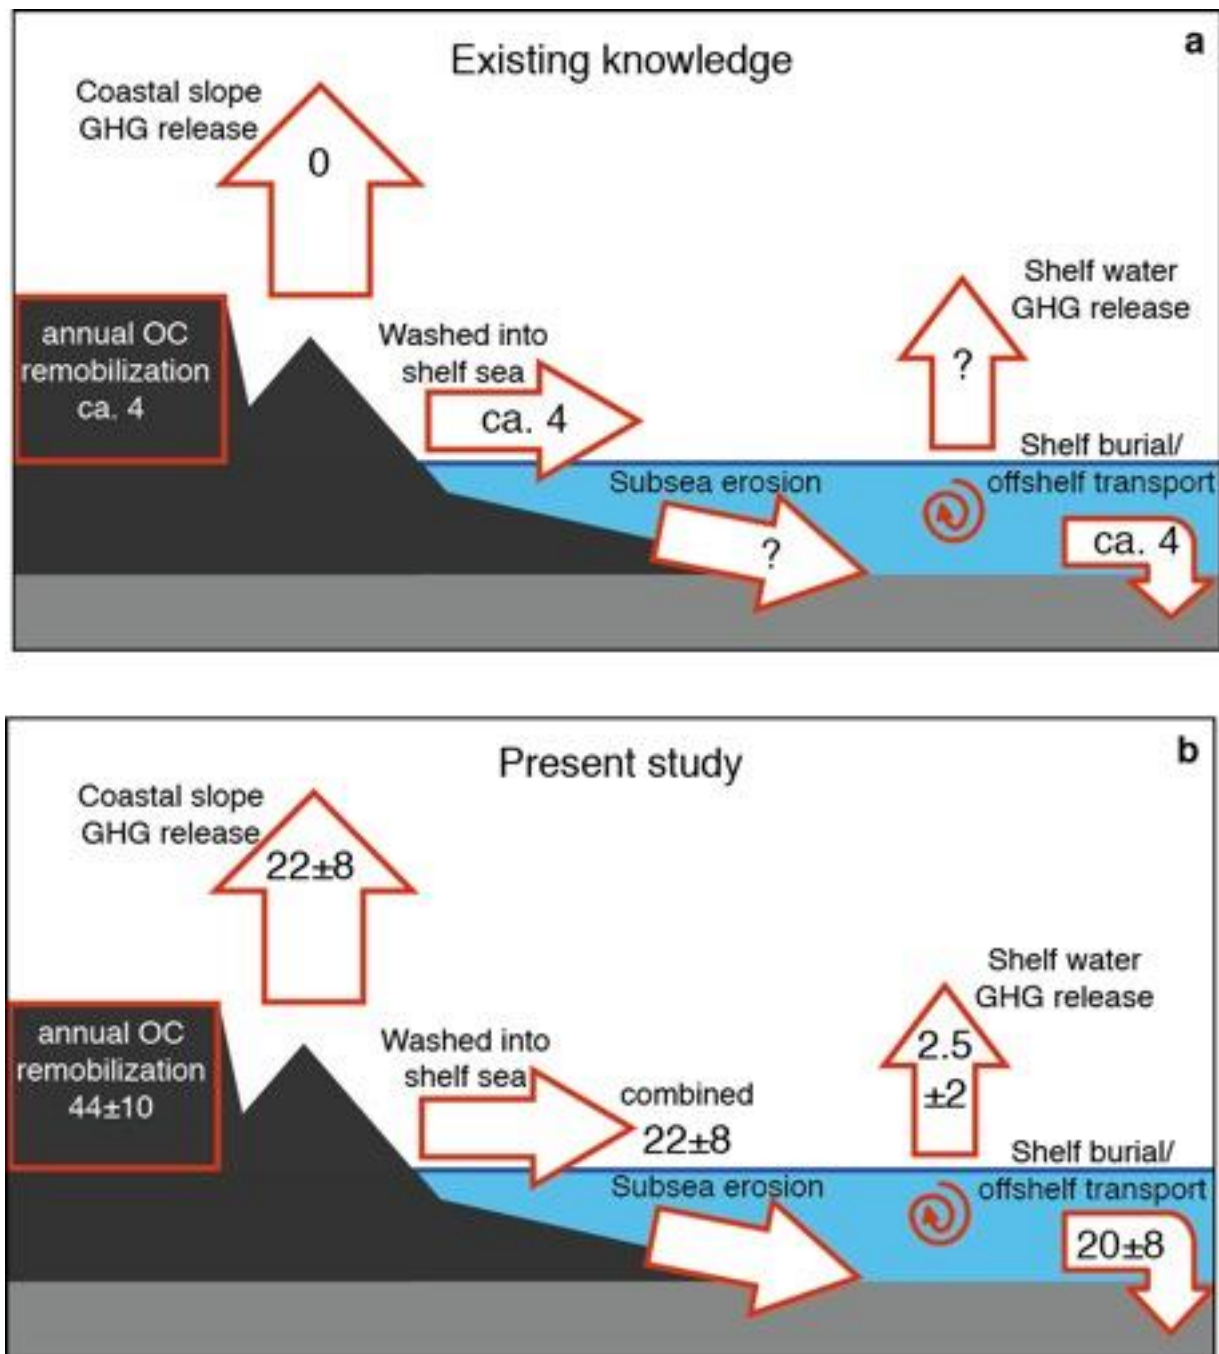

**Figure S1 | Coastal erosion fluxes from Ice Complex and subsea permafrost in the ESAS.**

**a**, The existing knowledge<sup>1-6</sup> on remobilization of coastal OC excludes sub-aerial degradation and acknowledges an unknown fate of this carbon in the coastal ocean. **b**, The current study on remobilization of coastal OC includes release of greenhouse gases (GHG) on the coastal slopes and details shelf degradation and deposition fluxes. All numbers reported as Tg OC/yr (mean±95% confidence interval).

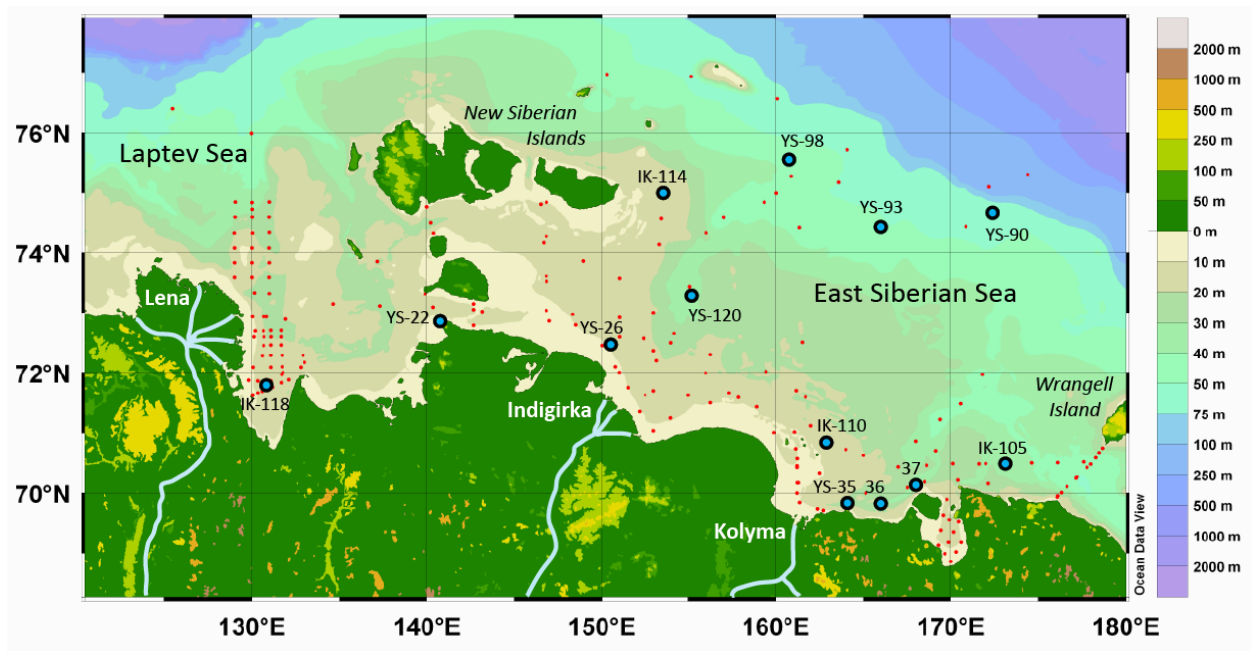

**Figure S2 | Sampling locations in the East Siberian Arctic Shelf region**

Map of the Laptev and East Siberian Seas showing all sampling locations for surface sediments (in red) and sediment cores (in blue).

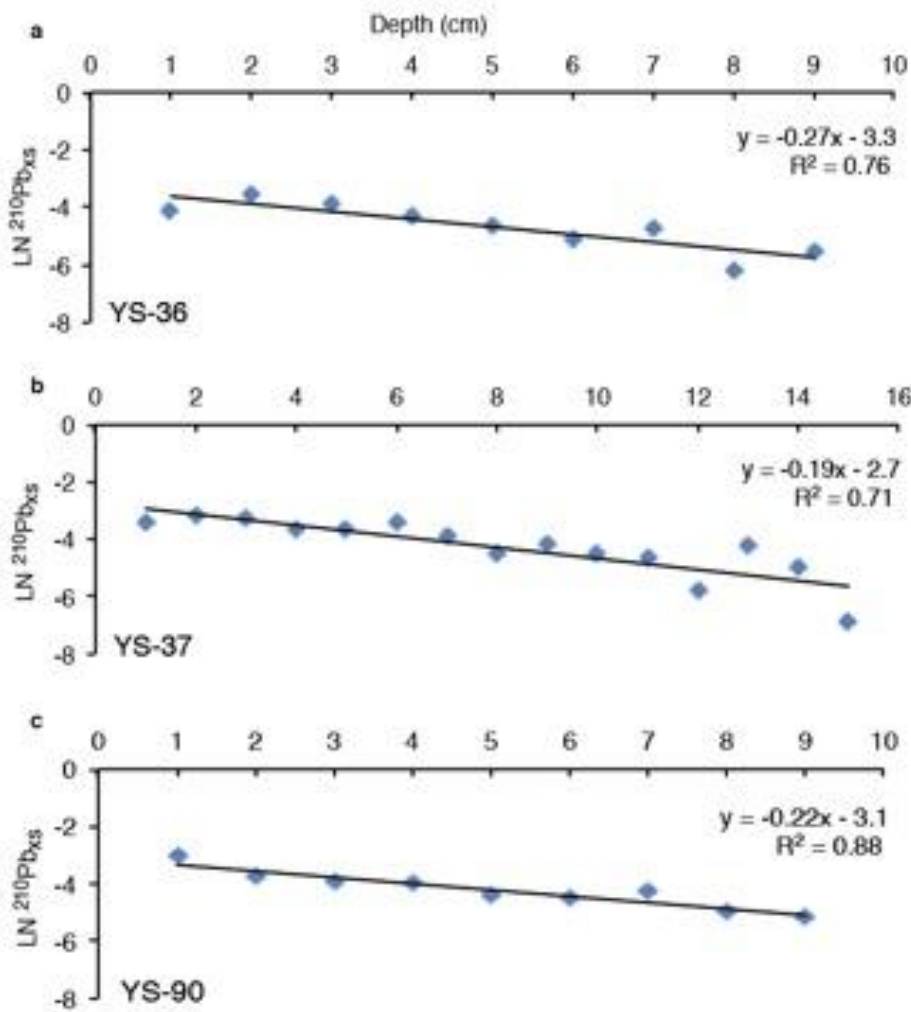

**Figure S3 | Radiochronological data for East Siberian Sea sediment cores.**

Regression plots of the natural logarithm of excess  $^{210}\text{Pb}$  ( $\text{LN } ^{210}\text{Pb}_{\text{xs}}$ ) against core depth (cm) for sediment cores **a**, YS-36, **b**, YS-37 and **c**, YS-90.

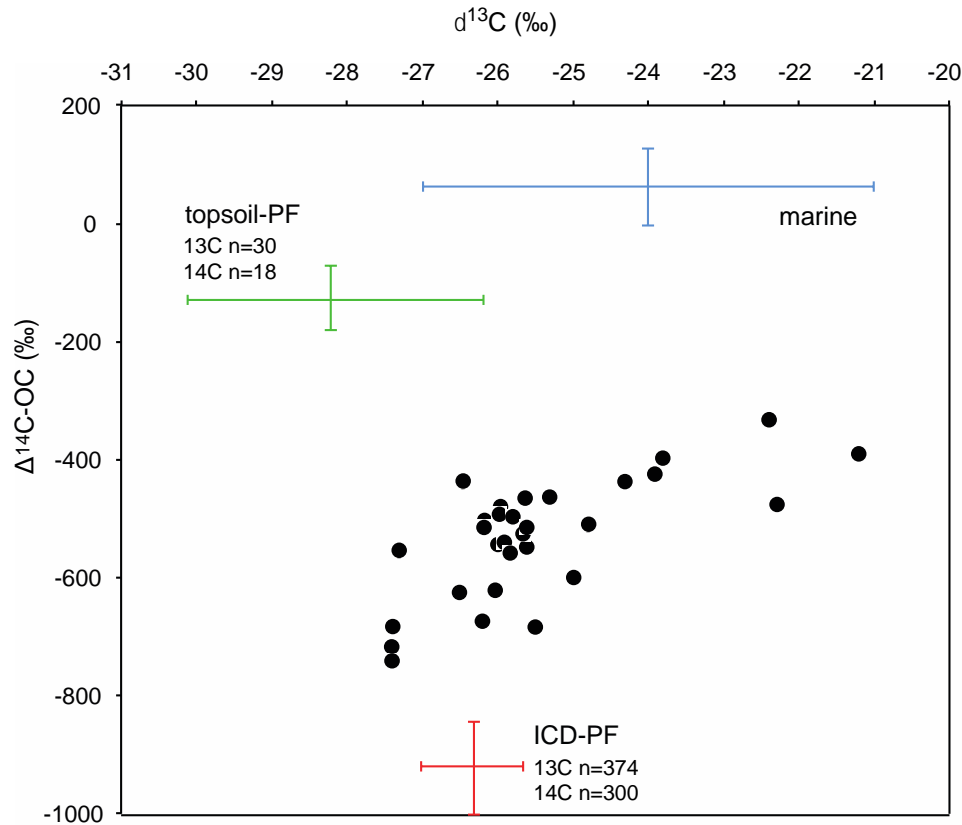

**Figure S4 | Isotopic values for topsoil-PF, ICD-PF and marine end-members**

Isotopic ranges that are used to define the marine, topsoil-PF, and ICD-PF end-members. Central values and references for applied range: marine  $\delta^{13}\text{C}$   $-24\pm 3.0\text{‰}$ ,  $\Delta^{14}\text{C}$   $+60\pm 60\text{‰}$  (refs 1, 7-17; Fig. S5; these papers report ranges, not individual data points), topsoil-PF  $\delta^{13}\text{C}$   $-28.2\pm 1.96\text{‰}$   $\Delta^{14}\text{C}$   $-126\pm 54\text{‰}$  (Table S3; refs 18-19, <http://arcticgreatrivers.org/data>, unpublished data from ISSS-08 and The Polaris Project), ICD-PF  $\delta^{13}\text{C}$   $-26.3\pm 0.67\text{‰}$   $\Delta^{14}\text{C}$   $-940\pm 84\text{‰}$  (Table S4; refs 20-40). Further explanation can be found in the Supplementary text. Black points refer to surface sediment values in the East Siberian Sea and Laptev Sea.

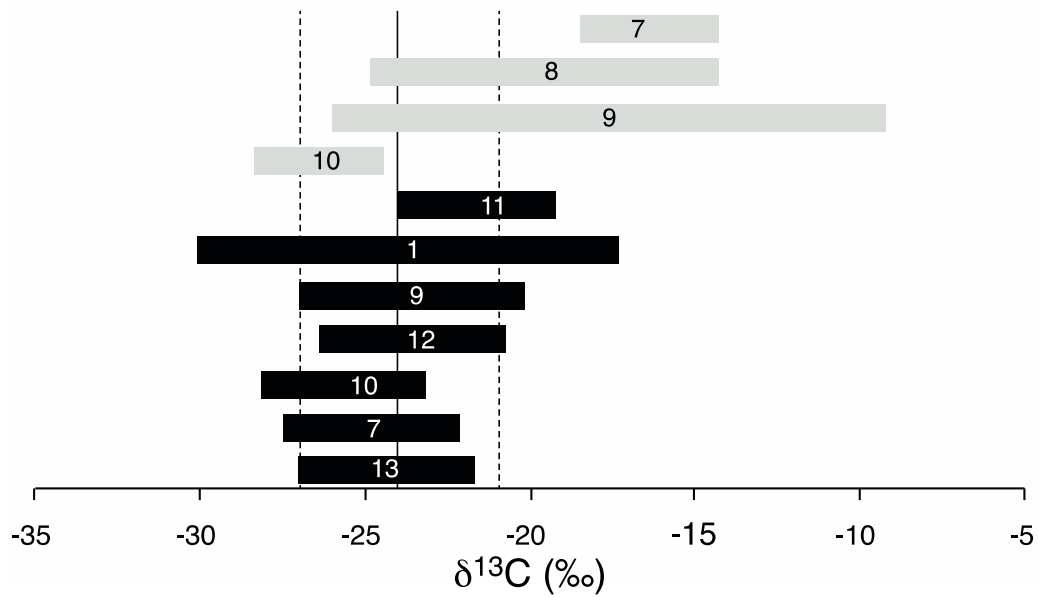

**Figure S5 | Literature values on  $\delta^{13}\text{C}$  signature of marine particulate organic matter and ice algae**

Reported literature values for  $\delta^{13}\text{C}$  on ice algae (grey bars, refs 7-10) and marine particulate organic matter (black bars, refs 1, 7, 9-13). Numbers on bars indicate references.

## Supplementary Methods

### Sampling campaigns

Surface sediments were collected at 83 stations during August/September 2008 as part of the International Siberian Shelf Study 2008 (ISSS-08) onboard the H/V *Yakob Smirnitkiy* and the smaller ship H/V *TB-0012* (Fig. S2). They were collected with a Van Veen grab sampler and a dual gravity corer (GEMAX, Kart Oy, Finland; modified at Stockholm University). The surface layers of the grab samples were retrieved with stainless steel spatulas, transferred into polyethylene containers and frozen until analysis. The sediment cores were sectioned into 1 cm slices with an extruder (Kart Oy, Finland), and likewise transferred into polyethylene containers and frozen until analysis.

Further sampling was performed in the Laptev and East Siberian Seas on several separate expeditions using the mid-size hydrographic vessels *Ivan Kireev* (2003/2004) and *Viktor Buynitskiy* (2007) (Fig. S2). For 117 stations, surface sediments were collected with a Van Veen grab sampler. The surface layers of the grab samples were retrieved with stainless steel spatulas, transferred into polyethylene containers and frozen until analysis.

### Bulk elemental and isotope analyses

From the ISSS-08 (n=83) and 2007 (n=20) stations, around 10 mg dried (60°C, 24 h), ground and homogenized sediment was weighed into pre-combusted silver capsules (5 x 9 mm, Sántis Analytical AG, Teufen, Switzerland). The samples were acidified *in situ* with 50 µl 1M HCl to remove carbonates and dried overnight at 60°C<sup>42</sup>. Total organic carbon (TOC) and total nitrogen (TN) content, as well as its  $\delta^{13}\text{C}$  signal were measured on triplicate samples using an elemental analyzer (EA) isotope ratio mass spectrometer (Europe Hydra 20/20, University of California, Davis Stable Isotope Facility, USA).

Elementary (TOC) and isotopic ( $\delta^{13}\text{C}$ ) composition of bottom sediments (n=97) for the 2003, 2004 and 2007 expeditions were determined by Carlo Erba elemental analyzers and a Finnigan MAT Delta Plus isotope ratio mass spectrometer, respectively, at the International Arctic Research Center, University of Alaska, Fairbanks (USA). Accuracy and reproducibility of the isotope results were within  $\delta^{13}\text{C} \pm 0.1\%$ .

A subset of 30 samples was freeze-dried (Christ Alpha 2-4, LSC with low carbon vacuum hybrid pump, Vacubrand RC-6; Martin Christ, Labex Instrument AB, Sweden) and sent to the U.S. National Ocean Sciences Accelerator Mass Spectrometry (NOSAMS) facility of the Woods Hole Oceanographic Institution (WHOI, Woods Hole, USA). Here the samples were acidified to remove

carbonates and analyzed for bulk organic  $^{14}\text{C}$  content by AMS.

### Sediment flux calculations

The  $^{210}\text{Pb}_{\text{xs}}$  activity of the sediment cores IK-105, IK-110, IK-114, IK-118, YS-22, YS-26, and YS-93 was derived based on measurements by Stockholm University with a co-axial low-energy gamma spectrometer (EG&G ORTEC) with a High-Purity Germanium (HPGe) detector. The  $^{210}\text{Pb}$  and  $^{226}\text{Ra}$  were analyzed in gas-tight containers about three weeks after sealing. Self-absorption corrections and thus overall counting efficiencies of the 46 keV line from  $^{210}\text{Pb}$  were done using an external  $^{210}\text{Pb}$  point source<sup>43</sup>, which for Stockholm University was a calibrated U-Th series pitchblende standard (Stackebo, Sweden). The measurements were blank subtracted and decay corrected to date of collection. Cores YS-35, YS-36, YS-37, YS-90, YS-98 and YS-120 were measured at the Radiation Research Division of the Risø National Laboratory for Sustainable Energy (Roskilde, Denmark) using low-energy HPGe detectors with a carbon entrance window. Most cores from these shallow shelves were unable to show a clear age-depth chronology, presumably caused by sediment resuspension, bioturbation and ice scouring effects, yet a few cores may be used for dating (Fig. S3). However, even in the absence of a linear sedimentation rate, it is possible to derive an average (over the mean lifetime of  $^{210}\text{Pb}$ ) sediment accumulation flux. Using the depth-integrated inventory of excess  $^{210}\text{Pb}$  ( $^{210}\text{Pb}_{\text{xs}}$ ), we were able to estimate annual OC accumulation rates (e.g., ref. 44). For each core slice (0-1cm, 1-2cm, 2-3cm, etc.), the excess  $^{210}\text{Pb}$  can be calculated according to:

$$^{210}\text{Pb}_{\text{xs}} [\text{Bq/gdw}] = A^{210}\text{Pb} [\text{Bq/gdw}] - A^{226}\text{Ra} [\text{Bq/gdw}] \quad (1)$$

where A is the activity. For each slice, excess  $^{210}\text{Pb}$  in Bq/gdw can be converted into Bq/cm<sup>2</sup> through multiplication with (1-porosity), dry density [g/cm<sup>3</sup>] and slice interval [cm]. Subsequently, the total  $^{210}\text{Pb}_{\text{xs}}$  in [Bq/cm<sup>2</sup>] per core can then be calculated from:

$$^{210}\text{Pb}_{\text{xs}} [\text{Bq/cm}^2] = \sum_{\text{all slices}} [^{210}\text{Pb}_{\text{xs}} [\text{Bq/gdw}] \times (1-\text{porosity}) \times \text{dry density} [\text{g/cm}^3] \times \text{slice interval} [\text{cm}]] \quad (2)$$

Porosities were calculated and salinity-corrected for the YS-cores. The values decreased downcore, and were generally higher on the outer shelf regions (71-92% in 0-1 cm, 37-51% for deepest slice; YS-90, 98, 120) than close to the coast (44-62% in 0-1 cm, 26-37% for deepest slice; YS-35, 36, 37). Dry densities measured for the YS-cores gave an average value of 2.7 g/cm<sup>3</sup> (n=6, stdev 0.36). The IK-cores were assumed to have porosities of 0.7 in the top slice and 0.6 deeper down, and dry densities of 2.7 g/cm<sup>3</sup>.

The mean life of  $^{210}\text{Pb}$  ( $\tau = 1/\lambda = 32.17$  yr) can be used to derive  $^{210}\text{Pb}_{\text{xs}}$  [Bq/cm<sup>2</sup>/yr]:



$${}^{210}\text{Pb}_{\text{xs}} [\text{Bq}/\text{cm}^2/\text{yr}] = {}^{210}\text{Pb}_{\text{xs}} [\text{Bq}/\text{cm}^2] / \tau \quad (3)$$

The total inventories of  ${}^{210}\text{Pb}_{\text{xs}}$  are between  $16 \pm 3.9$  and  $383 \pm 40$   $\text{Bq}/\text{m}^2/\text{yr}$  (mean  $\pm$  stdev; Table S2, S10), which is comparable to the suggested global range of unsupported  ${}^{210}\text{Pb}$  of 50–150  $\text{Bq}/\text{m}^2/\text{yr}$  (ref. 45), and comparable to fluxes in the northeast Atlantic (67–100  $\text{Bq}/\text{m}^2/\text{yr}$  (ref 44 and references therein)).

Finally, the annual sediment OC accumulation can be derived as follows:

$$\text{Flux OC} [\text{mg OC}/\text{m}^2/\text{yr}] = {}^{210}\text{Pb}_{\text{xs}} [\text{Bq}/\text{m}^2/\text{yr}] \times (\text{OC}_{z=0} [\text{mgOC}/\text{gdw}] / A {}^{210}\text{Pb}_{\text{xs at } z=0} [\text{Bq}/\text{gdw}]) \quad (4)$$

Note that for the cores YS-120, IK-114 and IK-118 there still was  ${}^{210}\text{Pb}_{\text{xs}}$  left in the deepest core section, and their annual OC accumulation rates are therefore minimal numbers.

When sediment cores are not mixed or bioturbated, one can calculate the sedimentation rate through the slope of the regression of the natural logarithm of  ${}^{210}\text{Pb}_{\text{xs}}$  against sediment depth.

$$S = -\lambda / m \quad (5)$$

where  $S$  is sedimentation rate (cm/yr),  $\lambda$  is the decay constant of  ${}^{210}\text{Pb}$  (0.031) and  $m$  is the slope. We tested this approach on sediment cores YS-36, YS-37, and YS-90 where the degree of mixing seemed only minor (Fig. S3). This resulted in sedimentation rates of 0.11 to 0.16 cm/yr and OC accumulation fluxes of 28–52  $\text{gOC}/\text{m}^2/\text{yr}$ . The latter numbers are of similar magnitude as the fluxes in Table S2 (based on equation 4).

#### End-members for dual-carbon isotopic mixing model

We have applied a dual-carbon ( $\delta^{13}\text{C}$  and  $\Delta^{14}\text{C}$ ) isotopic mixing model, similar to refs 46 and 47, to distinguish between three sources (Fig. S4): (i) topsoil permafrost (topsoil-PF) OC, the topsoil of the terrestrial permafrost (ii) Ice Complex permafrost (ICD-PF) OC, consisting of Ice Complex deposits (coastal and inland, but predominantly exposed at the coast) and subsea permafrost and (iii) marine OC (Fig. S4). We define two different terrestrial end-members to be able to derive relative contributions of (a) contemporary terrestrial material (vegetation debris, topsoils, shallow active layer) that is delivered from inland by rivers and from the top of coastal bluffs through erosion and collapse, and (b) (late) Pleistocene Ice Complex material that is delivered through coastal, delta and riverbank erosion, and deep thermokarst. The following three equations are used:

$$f_{\text{topsoil-PF}} + f_{\text{ICD-PF}} + f_{\text{marine}} = 1 \quad (6)$$

$$\delta^{13}\text{C}_{\text{sample}} = f_{\text{topsoil-PF}} \delta^{13}\text{C}_{\text{topsoil-PF}} + f_{\text{ICD-PF}} \delta^{13}\text{C}_{\text{ICD-PF}} + f_{\text{marine}} \delta^{13}\text{C}_{\text{marine}} \quad (7)$$

$$\Delta^{14}\text{C}_{\text{sample}} = f_{\text{topsoil-PF}} \Delta^{14}\text{C}_{\text{topsoil-PF}} + f_{\text{ICD-PF}} \Delta^{14}\text{C}_{\text{ICD-PF}} + f_{\text{marine}} \Delta^{14}\text{C}_{\text{marine}} \quad (8)$$

Where  $f_{\text{topsoil-PF}}$ ,  $f_{\text{ICD-PF}}$  and  $f_{\text{marine}}$  are the fractions for topsoil permafrost OC, coastal Ice Complex permafrost OC and marine OC contribution to the samples, respectively.

#### *Topsoil-PF end-member*

The topsoil-PF  $\delta^{13}\text{C}$  end-member (-28.2‰; stdev 1.96‰) is derived from a seasonal survey (April-May-June) of Kolyma and Lena River POC (n=17; -28.4‰, stdev 2.1‰) and DOC data (n=13; -28.0‰, stdev 1.8‰) from literature<sup>18,19</sup> and unpublished data (<http://arcticgreativers.org/data>; ISSS-08; The Polaris Project; Table S3). We chose Spring/early Summer data only, to ensure water flow is restricted to shallow flow paths (i.e. topsoils) as active layer deepening is still absent or minimal. Similarly, the topsoil-PF  $\Delta^{14}\text{C}$  value (-126‰; stdev 54‰) is derived from the mean of POC (n=5, Vonk et al., unpublished results; -319‰, stdev 83‰) and DOC (n=13; -66.1‰, stdev 46‰) data<sup>18,19</sup>. The end-member values are calculated as the average of POC and DOC data (Table S3). Monte Carlo test simulations with stronger weighing of POC or DOC (2/3 POC and 1/3 DOC, or 1/3 POC and 2/3 DOC) for a range of stations with variable topsoil-PF contributions showed only small shifts in topsoil-PF contributions (-0.11 to +2.6% or -0.21 to -1.8%, respectively).

#### *ICD-PF end-member*

The  $\delta^{13}\text{C}$  value of the ICD-PF end-member (-26.3‰, stdev 0.67‰, n=374) is taken from a recently published review<sup>20</sup> that in detail describes the characteristics and origin of Ice Complex deposits in Siberia. We have calculated a mean value from the data in this paper (ref. 20, page 18/Table 5), using the mean values of 12 different sites and weighing them based on the number of samples. The  $\Delta^{14}\text{C}$  value of the ICD-PF end-member (-940‰, stdev 84‰, n=300) is based on a large amount of data from a range of circum-arctic studies (mostly Russia, but also Alaska and NW Canada) on Ice Complex deposits<sup>20-40</sup> (Table S4). These papers typically report  $^{14}\text{C}$  ages as ky B.P., and we therefore have converted these ages into Fraction modern ( $F_m = e^{-\text{age}/8033}$ ) and subsequently into  $\Delta^{14}\text{C}$  (‰;  $\Delta^{14}\text{C} = [F_m \times [e^{\lambda(1950-Y_c)} - 1] \times 1000$ , where  $\lambda$  is  $1/(\text{true mean-life of } ^{14}\text{C})$  or  $1/8267$ , and we have assumed  $Y_c$  (year of collection) to be 1990). In total, these papers include 300  $^{14}\text{C}$  data points.

#### *Marine end-member*

Literature reports on a wide range of marine  $\delta^{13}\text{C}$  values for marine particulate organic matter in Arctic waters (Fig. S5, refs 1,7,9-13). Seasonally higher contributions of ice algae OC to the sedimentary OC are likely only minimal (4-26% of total primary production in seasonally ice-

covered waters, ref. 48), but could also deliver a variety of  $\delta^{13}\text{C}$  signatures. We measured a value of  $-24.0\text{‰}$  (triplicate measurement, analytical error  $0.016\text{‰}$ ) on plankton during ISSS-08, which we have decided to use as the central end-member value. Based on Arctic literature, we will apply a standard deviation of  $3.0\text{‰}$  (i.e. a range of  $-27\text{‰}$  to  $-21\text{‰}$ ) for the Monte Carlo simulations (Fig. S5).

We have tested different marine end-member values for two stations (YS-90; outer shelf, YS-30, nearshore) that showed maximal and minimal marine inputs ( $54\%$  and  $7\%$ , respectively, for the  $-24\pm 3.0\text{‰}$  end-member value). Monte Carlo simulations with two considerably different marine end-member values ( $-27\pm 3\text{‰}$ , and  $-21\pm 3\text{‰}$ ) showed only a  $<1\%$  shift in the ICD-PF contributions (similar stdev). The marine contribution shifted between  $2.2\text{--}3.8\%$  (stdevs ca.  $1\%$  larger), with a lower marine contribution for the  $-21\pm 3\text{‰}$  marine value, and a higher marine contribution for the  $-27\pm 3\text{‰}$  marine value. The topsoil-PF contribution showed the opposite: it shifted by  $2.1\text{--}4.1\%$  (stdevs  $1\text{--}2\%$  larger), decreasing when the  $-27\pm 3\text{‰}$  marine value is used, and increasing when a marine value of  $-21\pm 3\text{‰}$  is adopted. These test simulations show that even with a moderate change in the stable carbon isotopic composition of the marine end-member, our calculated ICD-PF contributions are robust and do not show significant variation.

No known measurements are available on  $\Delta^{14}\text{C}$  on plankton-POC in the East Siberian or Laptev Seas, but dissolved inorganic carbon (DIC) values in the central Arctic Ocean (surface waters) range between  $0$  and  $120\text{‰}$ <sup>13-16</sup>. Since DIC is most likely the signal taken up also in primary production, we have therefore chosen to apply a central value of  $+60\text{‰}$  with a range of  $60\text{‰}$  (i.e.  $+60\pm 60\text{‰}$ , mean $\pm$ stdev) in order to account for the  $0$  to  $120\text{‰}$  literature data.

### Monte Carlo simulations

The quantification of the relative source contributions (topsoil-PF, ICD-PF and marine) to the surface sediment OC content was estimated using a recently developed Monte Carlo (MC) method<sup>49</sup> (also used by refs 46 and 47). Briefly, mean values and standard deviations are calculated from the  $\delta^{13}\text{C}$  and  $\Delta^{14}\text{C}$  data for the three different sources. These values are used to generate the parameters of log-normal distributions that reproduce these values on the  $0 - 1$  interval. These log-normal distributions thus are approximations of the source profiles for the different carbon isotope ratios. A comparison between representing the source distributions by log-normal or normal distributions showed small differences ( $\sim 1\%$ ) in the calculated sources values<sup>49</sup>. Random sampling is then performed from these log-normal distributions, while simultaneously satisfying a mass-balance and  $0 - 1$  constraints, generating a large number of solutions. The experimental data points

are represented by normal distributions, using the measurement errors as the standard deviations. Solutions from the random sampling are sorted into histograms, generating probability density functions (PDFs). From the PDFs, the mean and standard deviations are calculated. The MC calculations were run using in-house written Matlab scripts, utilizing Matlab version 7.9.0 (The MathWorks, Natick, USA). We collected 100,000 random sampling events satisfying the boundary conditions for each sample, and the results were sorted into histograms with bin size of 256.

## **Muostakh Island case study**

### Muostakh Island study area

Muostakh is a very small island (ca. 2 km by 13 km) situated in a continuous permafrost region<sup>50</sup> in the southeastern Laptev Sea (71.60 °N; 130.02 °E), within the Buor-Khaya Bay (Figures 1 and 3). Coastal erosion in the Laptev Sea has been described to be the major supplier of sediments, with ratios over riverine input amounting to 2.5<sup>2</sup>. High cliffs and seasonal ice melting in the Laptev and East Siberian Sea result in higher erosion rates than for other Arctic coasts<sup>51</sup>. Consisting mainly of Cenozoic (geological era corresponding to the last 65,000 years) deposits, Muostakh Island rises up to ~25 m above sea level of Ice Complex containing discrete masses of detrital soil between ice wedges. The matrix of these bodies is mostly composed of silt and organic-rich silt (69±11% silt and 28±11% clays), with minor contribution of sand (2.5±0.4%) and a rather homogeneous granulometric distribution along the island<sup>52</sup>.

Average shoreline retreat rate in Muostakh is estimated to vary from ~1 to 20 m/yr, on the basis of a few present-day field measurements of shorelines and comparison with remote sensing information, and study of satellite images and aerial photographs from the period 1951-2002<sup>2-6</sup>. The loss of ICD-OC due to downslope degradation was estimated from the decrease of the soil OC content at the higher sites relative to those at the lower sampling sites in each slope (Table S7). Slope 2 lost 80% of its OC downslope ((3.5%-0.69%)/3.5%) (Table S7), whereas slopes 5 and 6 lost 49% and 68% OC, respectively. This resulted in 66±16% (mean±stdev) of original OC in the IC being lost to, presumably mostly, CO<sub>2</sub> during downslope transport of the thawed/thawing material.

### Muostakh Island sampling description

In July 2006, soil samples (0.3-40 g) were collected from different profile height along four different slopes of the Ice Complex bluff of the northern part of Muostakh Island (Fig. 3; Table

S7). The samples were dried and kept frozen until elemental (TOC and TN), isotopic ( $^{13}\text{C}$  and  $^{14}\text{C}$ ) and molecular biomarkers analysis.

#### Muostakh Island elemental and isotopic carbon analysis

Subsamples of dried and finely ground soil were weighed (5-50 mg) into pre-combusted silver capsules (5 x 9 mm, Säntis Analytical AG, Teufen, Switzerland). The soil TOC content and stable isotopic carbon signatures ( $\delta^{13}\text{C}$ ) were measured at Stockholm University (Department of Geological Sciences, Sweden), by means of a Carlo Erba NC2500 elemental analyzer connected via a split interface to a Finnigan MAT Delta Plus isotope ratio mass spectrometer. Prior to analysis, the bulk soil was acidified with 1 M HCl to remove carbonates, and dried (60° C, 24 h). Similarly, larger soil subsamples (4-70 mg) were decarbonated with 1M HCl, dried and sent to NOSAMS for  $^{14}\text{C}$  analyses.

#### Muostakh Island lipid extraction, fractionation and analysis

For the molecular biomarker analysis, freeze-dried soil samples between 0.1 and 5 g (depending on the soil OC content) were extracted with dichloromethane/methanol (DCM/MeOH, 2:1 (v/v)), using Soxhlet or Accelerated Solvent Extraction. Internal standards (D<sub>50</sub>-tetracosane, D<sub>39</sub>-eicosanoic acid and 2-hexadecanol) were added prior to extraction. The total lipid extracts were concentrated, cleaned, separated into non-polar, polar and acid fractions with Bond-Elut® (bonded phase NH<sub>2</sub>, Varian, Middelburg, The Netherlands) and Al<sub>2</sub>O<sub>3</sub> column chromatography and derivatized as described in ref. 53. Laboratory blanks revealed slight contamination of the C<sub>16</sub> and C<sub>18</sub> *n*-alkanoic acids, most likely derived from the Bond-Elut® columns<sup>54</sup>. No significant contamination was detected for any or the target analytes. Recoveries were found to be 73±38% on average. Identification and quantification of the non-polar, polar and acid fractions was performed by gas chromatography/mass spectrometry (GC/MS). We used a GC8060 equipped with an on-column injector and interfaced to a MD800 MS (both Fisons PLC, Ipswich, Suffolk, UK), operating with electron ionization at 70 eV and scanning from m/z 50 to 600. The analytes were injected (1 µl) on-column and separated on a PTE-5 (Supelco Inc, Bellefonte, USA) capillary column (5%-diphenyl-dimethylpolysiloxane, length 30 m, I.D. 0.25mm, film thickness 0.25 µm). The transfer line to the mass spectrometer was kept at 300 °C, with the ion source at 240 °C. Temperature program settings and compounds identification is described in detail by ref. 53.

#### Analysis of the CO<sub>2</sub> fluxes on Muostakh Island

The emission of CO<sub>2</sub> from the thawing ICD permafrost was measured simultaneously to the soil moisture content in early (7-12) September 2006. The measurements were taken along five

aboveground transects crossing the northern part of Muostakh Island from west to east (Fig. 3B). The CO<sub>2</sub> sampling transects roughly followed the soil sampling slopes, in order to assess potential emissions derived from the ICD degradation suggested by the bulk and molecular analyses. *In situ* CO<sub>2</sub> analysis was carried out with automatic lid chambers attached to an infrared gas analyzer (LICOR 8100), according to procedures detailed elsewhere<sup>55</sup>. At the heart of the LICOR 8100 System lies the Analyzer Control Unit (ACU), an O-ring sealed, weather-tight enclosure that houses system electronics and the infrared gas analyzer (IRGA) used to measure the change in CO<sub>2</sub> and H<sub>2</sub>O concentrations in the soil chamber. The different mechanisms controlling the opening and closing of the long-term chambers do not affect the measurements. Both chambers lower slowly onto the measurement site to minimize pressure pulsations that change soil CO<sub>2</sub> concentrations. In total, CO<sub>2</sub> emissions were measured in duplicate or triplicate (3 minutes per measurement) from 30 sampling sites along the five transects. Although most of the CO<sub>2</sub> sampling was realized on land (n=28), two CO<sub>2</sub> measurements were collected at shallow-submerged sites of one transect, to check the CO<sub>2</sub> out-gassing beyond the shoreline. Respiration fluxes are reported as mmol/m<sup>2</sup>/day (Fig. 3B) and represent average values of the duplicate or triplicate measurements.

The CO<sub>2</sub> fluxes measured in Muostakh Island (3.2 to 440 mmol/m<sup>2</sup>/day; Table S8) were in the range of respiration fluxes (192-442 mmol/m<sup>2</sup>/day) measured in July 1998 on unvegetated Ice Complex in the Kolyma River basin, NE Siberia<sup>56</sup>, but around one order of magnitude higher than *in situ* measurements on Ice Complex scarps of the neighboring Primorsky coastal plain (high Arctic tundra near Tiksi) (8.6-95 mmol/m<sup>2</sup>/day), and modeled future (yrs. 2050-2100) CO<sub>2</sub> fluxes from Ice Complex in the Yakutsk area of 46 mmol/m<sup>2</sup>/day<sup>57</sup>. When vegetation is absent, larger CO<sub>2</sub> fluxes are measured on the IC slopes of Muostakh Island, suggesting significant ongoing degradation.

## References

1. Stein, R. & Macdonald, R. W. Eds. *The Organic Carbon Cycle in the Arctic Ocean*. (Springer, Berlin, 2004).
2. Rachold, V. *et al.* Coastal erosion vs riverine sediment discharge in the Arctic Shelf seas. *Int. J. Earth Sci.* **89**, 450-460 (2000).
3. Are, F. E. *Thermal Abrasion of Sea Coasts* (Nauta Publ. Moscow, 1980).
4. Overduin, P. P. *et al.* The evolution and degradation of coastal and offshore permafrost in the Laptev and East Siberian Seas during the last climatic cycle. *Geol. S. Am. S.* **426**, 97-110 (2007).

5. Semiletov, I. P. Destruction of the coastal permafrost ground as an important factor in biogeochemistry of the Arctic Shelf waters. *Dokl. Earth Sci.* **368**, 679-682 (1999).
6. Grigoriev, M. N. & Kunitsky, V. V. *Ice complex of the Arctic coast of Yakutia as a source of detrital deposits on the shelf, Hydrometeorological and biogeochemical researches in Arctic regions*, The Arctic Areal Centre, issue II, part. 1 (Vladivostok: Dalnauka, 2000).
7. Schubert, C. J. & Calvert, S. E. Nitrogen and carbon isotopic composition of marine and terrestrial organic matter in Arctic Ocean sediments: implications for nutrient utilization and organic matter composition. *Deep-Sea Res. I* **48**, 789-810 (2001).
8. Gradinger, R. Sea-ice algae: Major contributors to primary production and algal biomass in the Chukchi and Beaufort Seas during May/June 2002. *Deep-Sea Res. II* **56**, 1201-1212 (2009).
9. Tremblay, J.-E., Michel, C., Hobson, K. A., Gosselin, M. & Price, N. M. Bloom dynamics in early opening waters of the Arctic Ocean. *Limnol. Oceanogr.* **51**(2), 900-912 (2006).
10. Iken, K., Bluhm, B. A. & Gradinger, R. Food web structure in the High Arctic Canada basin: Evidence from d13C and d15N analysis. *Polar Biol.* **28**, 238-249 (2005).
11. Goñi, M. A., Yunker, M. B., Macdonald, R. W. & Eglinton, T. I. Distribution and sources of organic biomarkers in arctic sediments from the Mackenzie River and Beaufort Shelf. *Mar. Chem.* **71**, 23-51 (2000).
12. O'Brien, M. C., Macdonald, R. W., Melling, H. & Iseki, K. Particle fluxes and geochemistry on the Canadian Beaufort Shelf: Implications for sediment transport and deposition. *Cont. Shelf Res.* **26**, 41-81 (2006).
13. Goericke, R. & Fry, B. Variations of marine plankton d13C with latitude, temperature, and dissolved CO<sub>2</sub> in the world ocean. *Global Biogeochem. Cycles* **8**, 85-90 (1994).
14. Griffith, D. R. *et al.* Carbon dynamics in the Western Arctic Ocean: insights from full-depth carbon isotope profiles of DIC, DOC and POC. *Biogeosciences* **9**, 1217-1224 (2012).
15. Schlosser, P. *et al.* On the 14C and 39Ar distribution in the central Arctic Ocean: Implications for deep water formation. *Radiocarbon* **36**(3), 327-343 (1994).
16. Schlosser, P. *et al.* The first trans-Arctic 14C section: comparison of the mean ages of the deep waters in the Eurasian and Canadian basins of the Arctic Ocean. *Nucl. Instrum. Methods B* **123**, 431-437 (1997).
17. Key, R. M. *et al.* A global ocean carbon climatology: Results from Global Data Analysis Project (GLODAP). *Global Biogeochem. Cycles* **18**, GB4031 (2004).
18. Neff, J. *et al.* Seasonal changes in the age and structure of dissolved organic carbon in Siberian rivers and streams. *Geophys. Res. Lett.* **33**, L23401 (2006).

19. McClelland, J. W. *et al.* Development of a pan-arctic database for river chemistry. *EOS Trans. AGU* **89**, 217-218 (2008).
20. Schirrneister, L. *et al.* Sedimentary characteristics and origin of the Late Pleistocene Ice Complex on north-east Siberian Arctic coastal lowlands and islands – A review. *Quatern. Int.* **241**, 3-25 (2011).
21. Müller, S., Bobrov, A. A., Schirrneister, L., Andreev, A. A. & Tarasov, P. E. Testate amoebae record from the Laptev Sea coast and its implication for the reconstruction of Late Pleistocene and Holocene environments in the Arctic Siberia. *Palaeogeog. Palaeocl.* **271**, 301-315 (2009).
22. Schirrneister, L. *et al.* Late Quaternary history of the accumulation plain north of the Chekanovsky ridge (Lena delta, Russia): A multidisciplinary approach. *Polar Geography* **27**(4), 277-319 (2003).
23. Wetterich, S. *et al.* Palaeoenvironmental dynamics inferred from late Quaternary permafrost deposits on Kurungnakh Island, Lena Delta, Northeast Siberia, Russia. *Quaternary Sci. Rev.* **27**, 1523-1540 (2008).
24. Schirrneister, L., Siegert, C., Kunitsky, V. V., Grootes, P. M. & Erlenkeuser, H. Late Quaternary ice-rich permafrost sequences as a paleoenvironmental archive for the Laptev Sea Region in northern Siberia. *Int. J. Earth Sci.* **91**, 154-167 (2002).
25. Andreev, A. A. *et al.* Paleoenvironmental changes in Northeastern Siberia during the Late Quaternary – Evidence from pollen records of the Bykovsky Pensinsula. *Polarforschung* **70**, 13-25 (2002).
26. Grosse, G. *et al.* Geological and geomorphological evolution of a sedimentary periglacial landscape in Northeast Siberia during the Late Quaternary. *Geomorphology* **86**, 25-51 (2007).
27. Slagoda, E. A. *Genesis and microstructure of cryolithogenic deposits at the Bykovsky Peninsula and the Muostakh Island*. PhD Thesis. Russian Academy of Science, Siberian Branch, Permafrost Institute Yakutsk (in Russian).
28. Kanevski, M., Shur, Y., Fortier, D., Jorgenson, M. T. & Stephani, E. Cryostratigraphy of the late Pleistocene syngenetic permafrost (yedoma) in northern Alaska, Itkillik River exposure. *Quaternary Res.* **75**, 584-596 (2011).
29. Carter, L. D. Loess and deep thermokarst basins in Arctic Alaska. *Proceedings of the Fifth International Conference on Permafrost*. Tapir Publishers, Trondheim, Norway, pp. 706-711 (1988).
30. Dutta, K., Schuur, E. A. G., Neff, J. C. & Zimov, S. A. Potential carbon release from permafrost soils of Northeastern Siberia. *Glob. Change Biol.* **12**, 2336-2351 (2006).



31. Vasil'chuk, Y. K., van der Plicht, J., Jungner, H., Sonninen, E. & Vasil'chuk, A. C. First direct dating of Late Pleistocene ice-wedges by AMS. *Earth Planet. Sc. Lett.* **179**, 237-242 (2000).
32. Vasil'chuk, Y. K. & Vasil'chuk, A. C. Radiocarbon dating and oxygen isotope variations in Late Pleistocene syngenetic ice-wedges, Northern Siberia. *Permafrost Perigl.* **8**, 335-345 (1997).
33. Vasil'chuk, Y. K. Heterochroneity and heterogeneity of the Duvanny Yar Edoma. *Dokl. Earth Sci.* **402**(4), 568-573 (2005).
34. Vasil'chuk, Y. K. & Vasil'chuk, A. C. Oxygen-isotope and C14 data associated with Late Pleistocene syngenetic ice-wedges in mountains of Magadan region, Siberia. *Permafrost Periglac.* **9**, 177-183 (1998).
35. Westgate, J. A., Preece, S. J., Kotler, E. C. & Hall, S. Dawson tephra: a prominent stratigraphic marker of late Wisconsinan age in west-central Yukon, Canada. *Can. J. Earth Sc.* **37**, 621-627 (2000).
36. Froese, D., Westgate, J., Preece, S. & Storer, J. Age and significance of the Late Pleistocene Dawson tephra in eastern Beringia. *Quaternary Sci. Rev.* **21**, 2137-2142 (2002).
37. Fraser, T. A. & Burn, C. R. On the nature and origin of "muck" deposits in the Klondike area, Yukon Territory. *Can. J. Earth Sc.* **34**, 1333-1344 (1997).
38. Kotler, E. & Burn, C. R. Cryostratigraphy of the Klondike "muck" deposits, west-central Yukon Territory. *Can. J. Earth Sc.* **37**, 849-861 (2000).
39. Péwé, T. L., Journaux, A. & Stuckenrath, R. Radiocarbon dates and Late-Quaternary stratigraphy from Mamontova Gora, unglaciated central Yakutia, Siberia, U.S.S.R. *Quaternary Res.* **8**, 51-63 (1977).
40. Zech, M. *et al.* Characterisation and palaeoclimate of a loess-like permafrost palaeosol sequence in NE Siberia. *Geoderma* **143**, 281-295 (2008).
41. Sánchez-García, L. *et al.* Inventories and behavior of particulate organic carbon in the Laptev and East Siberian seas. *Global Biogeochem. Cycles* **25**, GB2007 (2011).
42. Gustafsson, Ö., Haghseta, F., Chan, C., MacFarlane, J. & Schwend, P. M. Quantification of the dilute sedimentary soot phase: Implications for PAH speciation and bioavailability. *Environ. Sci. Technol.* **31**, 203-209 (1997).
43. Cutshall, N. H., Larsen, I. L. & Olsen, C. R. Direct analysis of <sup>210</sup>Pb in sediment samples: self adsorption corrections. *Nucl. Instrum. Methods* **206**, 309-312 (1983).
44. Carvalho, F. P., Oliveira, J. M. & Soares, A. M. M. Sediment accumulation and bioturbation rates in the deep Northeast Atlantic determined by radiometric techniques. *ICES J. Mar. Sci.* **68**, 427-435 (2011).

45. Appleby, P. G. & Oldfield, F. Application of lead-210 to sedimentation studies. In: Ivanovich, M. and Harmon, R.S., Eds., *Uranium-series Disequilibrium: Application to Earth, Marine and Environmental Sciences*, Clarendon Press, Oxford, pp. 731–738 (1992).
46. Vonk, J. E. *et al.* Molecular and radiocarbon constraints on sources and degradation of terrestrial organic carbon along the Kolyma paleoriver transect, East Siberian Sea. *Biogeosciences* **7**, 3153–3166 (2010).
47. Karlsson, E. S. *et al.* Carbon isotopes and lipid biomarker investigation of sources, transport and degradation of terrestrial organic matter in the Buor-Khaya Bay, SE Laptev Sea. *Biogeosciences* **8**, 1865–1879 (2011).
48. Legendre, L. *et al.* Ecology of sea ice biota, 2. Global significance. *Polar Biol.* **12**, 429–444 (1992).
49. Andersson, A. A systematic examination of a random sampling strategy for source apportionment calculations. *Sci. Total Environ.* doi:10.1016/j.scitotenv.2011.10.31 (2011).
50. Brown, J., Ferrians Jr., O. J., Heginbottom, J. A. & Melnikov, E. S. *Circum-arctic Map of Permafrost and Ground-Ice conditions*. USGS Circum-Pacific Map Series CP-45 (scale 1:10,000 000) (US-Geological Survey, 1997).
51. Forbes, D. L. (Ed.) *State of the Arctic Coast 2010 – A Scientific Review and Outlook*. International Arctic Science Committee, Land-Ocean Interactions in the Coastal Zone, Arctic Monitoring and Assessment Programme, International Permafrost Association, Helmholtz-Zentrum, Germany, 178 pp. <http://arcticcoasts.org> (2010).
52. Dudarev, O. V., Semiletov, I. P., Charkin, A. N. & Botsul, A. I. Deposition settings on the continental shelf of the East Siberian Sea. *Dokl. Earth Sci.* **409**(6), 822–827 (2006).
53. Vonk, J. E., van Dongen, B. E. & Gustafsson, Ö. Lipid biomarker investigation of the origin and diagenetic state of sub-arctic terrestrial organic matter presently exported into the northern Bothnian Bay. *Mar. Chem.* **112**, 1–10 (2008).
54. Russell, J. M. & Werne, J. P. The use of solid phase extraction columns in fatty acid purification. *Org. Geochem.* **38**, 48–51 (2007).
55. Semiletov, I., Makshtas, A., Akasofu, S.-I. & Andreas, E. L. Atmospheric CO<sub>2</sub> balance: The role of Arctic sea ice. *Geophys. Res. Lett.* **31**, L05121 (2004).
56. Zimov, S. A. *et al.* Permafrost carbon: Stock and decomposability of a globally significant carbon pool. *Geophys. Res. Lett.* **33**, L20502 (2006).
57. Khvorostyanov, D. V. *et al.* Vulnerability of permafrost carbon to global warming. Part II: sensitivity of permafrost carbon stock to global warming. *Tellus* **60B**, 265–275 (2008).

### Table S1 | Summary of bulk geochemical data for surface sediments in the East Siberian Arctic Shelf.

Mean, maximum and minimum values for sediment organic carbon (OC),  $\delta^{13}\text{C}$  contents, and TOC/TN mass ratios for 200 surface sediment stations in the Laptev and East Siberian Seas. All individual data can be found in Table S9. The  $\delta^{13}\text{C}$  and  $^{14}\text{C}$  age are measured relative to VPDB and Oxalic Acid I standards, respectively

| Region                                | n  | sed. OC <sup>1</sup><br>mg/gdw | Max<br>Min    | $\delta^{13}\text{C}$<br>(‰) | max<br>min     | TOC/TN <sup>1</sup> | max<br>min   | n  | $\Delta^{14}\text{C}$<br>(‰) | max<br>min   |
|---------------------------------------|----|--------------------------------|---------------|------------------------------|----------------|---------------------|--------------|----|------------------------------|--------------|
| <b>Laptev Sea</b>                     |    |                                |               |                              |                |                     |              |    |                              |              |
| North of 73°N                         | 26 | 9.11                           | 19.2<br>0.300 | -25.6                        | -24.3<br>-26.2 | 9.59                | 15.3<br>3.00 | 3  | -486                         | -557<br>-437 |
| South of 73°N                         | 38 | 18.2                           | 25.8<br>3.17  | -25.9                        | -25.2<br>-27.5 | 11.4                | 14.9<br>9.40 | 11 | -516                         | -622<br>-436 |
| Dmitry Laptev<br>/Sannikov<br>Straits | 10 | 9.92                           | 20.8<br>3.88  | -27.0                        | -25.8<br>-27.4 | 9.42                | 12.5<br>6.93 | 1  | -716                         | -<br>-       |
| <b>East Siberian Sea</b>              |    |                                |               |                              |                |                     |              |    |                              |              |
| West of 160°E                         | 47 | 10.7                           | 20.4<br>4.06  | -25.8                        | -23.8<br>-28.3 | 11.7                | 16.3<br>6.63 | 5  | -675                         | -741<br>-600 |
| East of 160°E                         | 38 | 11.1                           | 20.1<br>3.90  | -25.5                        | -23.8<br>-27.3 | 8.80                | 14.9<br>6.08 | 4  | -514                         | -624<br>-425 |
| Outer shelf<br>(>40 m depth)          | 15 | 8.49                           | 10.4<br>7.60  | -23.3                        | -21.2<br>-24.8 | 5.66                | 6.17<br>5.24 | 5  | -422                         | -511<br>-332 |
| Chaunskaya Bay                        | 12 | 11.9                           | 25.3<br>1.30  | -25.9                        | -24.4<br>-27.0 | 10.9                | 13.0<br>8.00 | -  | -                            | -<br>-       |
| Long Strait                           | 14 | 16.1                           | 21.9<br>11.0  | -23.2                        | -21.9<br>-24.3 | 8.42                | 10.8<br>6.35 | -  | -                            | -<br>-       |

<sup>1</sup>For sediment OC and TOC/TN, outliers have been excluded (3 and 8 values respectively). Outliers are defined as observations farther than 1.5 \* interquartile range from the closest quartile.

**Table S2 | Fluxes of organic carbon to surface sediments in the East Siberian Arctic Shelf.**

Sediment core locations can be found in Fig. S2.

| Station                  | Core length<br>(cm) | Depth<br>(m) | Total core<br>$^{210}\text{Pb}_{xs}$<br>(Bq/m <sup>2</sup> /yr) | stdev |     | OC bottom<br>slice <sup>1</sup><br>(mg/gdw) | Activity $^{210}\text{Pb}$<br>(Bq/gdw) | OC flux to<br>sediment <sup>2</sup><br>(gOC/m <sup>2</sup> /yr) |
|--------------------------|---------------------|--------------|-----------------------------------------------------------------|-------|-----|---------------------------------------------|----------------------------------------|-----------------------------------------------------------------|
| <b>Laptev Sea</b>        |                     |              |                                                                 |       |     |                                             |                                        |                                                                 |
| IK-118-A <sup>3</sup>    | 58                  | 15           | 197                                                             | 15    | 18  |                                             | 0.058                                  | 60                                                              |
| <b>East Siberian Sea</b> |                     |              |                                                                 |       |     |                                             |                                        |                                                                 |
| <i>West</i>              |                     |              |                                                                 |       |     |                                             |                                        |                                                                 |
| YS-22 <sup>3</sup>       | 15                  | 20           | 313                                                             | 14    | 12  |                                             | 0.029                                  | 130                                                             |
| YS-26 <sup>3</sup>       | 14                  | 16           | 178                                                             | 11    | 8.7 |                                             | 0.036                                  | 43                                                              |
| YS-35                    | 11                  | 31           | 38.7                                                            | 6.4   | 13  |                                             | 0.030                                  | 17                                                              |
| IK-110-A                 | 13                  | 17           | 16.2                                                            | 3.9   | 4.7 |                                             | 0.010                                  | 7.6                                                             |
| IK-114-A <sup>3</sup>    | 40                  | 16           | 26.2                                                            | 3.2   | 6.2 |                                             | 0.009                                  | 18                                                              |
| <i>Central</i>           |                     |              |                                                                 |       |     |                                             |                                        |                                                                 |
| YS-36                    | 14                  | 32           | 51.1                                                            | 6.3   | 11  |                                             | 0.016                                  | 33                                                              |
| YS-37                    | 15                  | 42           | 123                                                             | 8.8   | 12  |                                             | 0.033                                  | 43                                                              |
| YS-98                    | 12                  | 48           | 87.1                                                            | 11    | 9.4 |                                             | 0.022                                  | 38                                                              |
| YS-120 <sup>3</sup>      | 11                  | 33           | 249                                                             | 13    | 11  |                                             | 0.076                                  | 36                                                              |
| IK-105-A                 | 25                  | 37           | 383                                                             | 40    | 14  |                                             | 0.134                                  | 40                                                              |
| <i>East/outer</i>        |                     |              |                                                                 |       |     |                                             |                                        |                                                                 |
| YS-93 <sup>3</sup>       | 14                  | 51           | 140                                                             | 10    | 8.0 |                                             | 0.038                                  | 29                                                              |
| YS-90                    | 17                  | 63           | 51.2                                                            | 8.5   | 7.2 |                                             | 0.048                                  | 7.7                                                             |
|                          |                     |              |                                                                 |       |     |                                             | mean±95%CI <sup>4</sup>                | 36±17                                                           |

<sup>1</sup> For YS-22, YS-26 and YS-93, the OC content of the top slice was used. The other cores showed no clear difference between OC content in the top versus bottom; the values were comparable and without any significant decrease downcore.

<sup>2</sup> According to:  $\text{Flux sediment OC [mg OC/m}^2\text{/yr]} = \sum_{\text{all slices}} ^{210}\text{Pb}_{xs} [\text{Bq/m}^2\text{/yr}] \times (\text{OC}_{z=0} [\text{mgOC/gdw}] / A^{210}\text{Pb}_{xs \text{ at } z=0} [\text{Bq/gdw}])$ . Further details can be found in the method section.

<sup>3</sup> The deepest core slice still contained  $^{210}\text{Pb}_{xs}$ . The sediment OC accumulation fluxes for these stations are therefore minimal estimates.

<sup>4</sup> 95% confidence interval for n=12 data points (East Siberian Sea only).

**Table S3 | Topsoil-PF end-member source data**

Combined literature and unpublished  $\delta^{13}\text{C}$  and  $\Delta^{14}\text{C}$  results on POC and DOC in the Kolyma and Lena Rivers during April, May and June (multiple years), used as source data for the topsoil-PF end-member.

| River           | Sampling date | $\delta^{13}\text{C}$ (‰) |       | $\Delta^{14}\text{C}$ (‰) |                                                                                 | Source                                                                          |
|-----------------|---------------|---------------------------|-------|---------------------------|---------------------------------------------------------------------------------|---------------------------------------------------------------------------------|
|                 |               | POC                       | DOC   | POC                       | DOC                                                                             |                                                                                 |
| Kolyma River    | 11-Jun-04     | -26.5                     | -27.3 |                           | 86.8                                                                            | Ref. 19                                                                         |
|                 | 15-Jun-04     | -28.1                     | -30.0 |                           | -3.9                                                                            | Ref. 19                                                                         |
|                 | 25-Jun-04     | -29.7                     | -27.4 |                           | 44.8                                                                            | Ref. 19                                                                         |
|                 | 22-Apr-05     | -34.6                     | -27.2 |                           | 20.4                                                                            | Ref. 19                                                                         |
|                 | 30-Jun-05     | -30.5                     | -26.1 |                           | -12.7                                                                           | Ref. 19                                                                         |
|                 | 05-Jun-09     | -27.4                     |       |                           |                                                                                 | <a href="http://arcticgreativers.org/data">http://arcticgreativers.org/data</a> |
|                 | 12-Jun-09     | -27.3                     |       |                           |                                                                                 | <a href="http://arcticgreativers.org/data">http://arcticgreativers.org/data</a> |
|                 | 21-Jun-09     | -28.0                     |       |                           |                                                                                 | <a href="http://arcticgreativers.org/data">http://arcticgreativers.org/data</a> |
|                 | 11-Jun-03     |                           | -32.2 |                           | 52.6                                                                            | Ref. 18                                                                         |
|                 | 30-Jun-03     |                           | -27.9 |                           | 52.7                                                                            | Ref. 18                                                                         |
|                 | 28-May-03     |                           | -30   |                           | 116                                                                             | Ref. 18                                                                         |
|                 | 30-Apr-11     |                           |       |                           | -203                                                                            | Vonk et al., unpublished                                                        |
|                 | 01-Jun-11     |                           |       |                           | -286                                                                            | Vonk et al., unpublished                                                        |
|                 | 31-May-11     |                           |       |                           | -310                                                                            | Vonk et al., unpublished                                                        |
|                 | 14-Jun-11     |                           |       |                           | -387                                                                            | Vonk et al., unpublished                                                        |
|                 | 13-Jun-11     |                           |       |                           | -410                                                                            | Vonk et al., unpublished                                                        |
| Lena River      | 09-Apr-04     | -31.5                     | -27.2 |                           | 63.0                                                                            | Ref. 19                                                                         |
|                 | 05-Jun-04     | -27.7                     | -27.3 |                           | 120                                                                             | Ref. 19                                                                         |
|                 | 07-Jun-04     | -27.4                     | -28.3 |                           | 121                                                                             | Ref. 19                                                                         |
|                 | 27-May-05     | -27.8                     | -25.2 |                           | 112                                                                             | Ref. 19                                                                         |
|                 | 04-Jun-05     | -26.9                     | -27.3 |                           | 87.0                                                                            | Ref. 19                                                                         |
|                 | 06-Jun-06     | -27.8                     |       |                           |                                                                                 | Ref. 19                                                                         |
|                 | 31-May-09     | -27.1                     |       |                           |                                                                                 | <a href="http://arcticgreativers.org/data">http://arcticgreativers.org/data</a> |
|                 | 05-Jun-09     | -27.2                     |       |                           |                                                                                 | <a href="http://arcticgreativers.org/data">http://arcticgreativers.org/data</a> |
| 11-Jun-09       | -26.6         |                           |       |                           | <a href="http://arcticgreativers.org/data">http://arcticgreativers.org/data</a> |                                                                                 |
| Mean            |               | -29.0                     | -28.5 | -319                      | 44.6                                                                            |                                                                                 |
| Average POC+DOC |               | -28.2                     |       | -126.4                    |                                                                                 |                                                                                 |

**Table S4 | ICD-PF end-member source data**Collected  $\Delta^{14}\text{C}$  data from literature on Ice Complex deposits in Siberia, Alaska and Canada, used as source data for the ICD-PF end-member.

| Sample/<br>Lab ID # | Location               | Lat<br>(°N) | Long<br>(°E) | Height <sup>1</sup><br>(m) | Material                  | <sup>14</sup> C <sup>2</sup><br>(yrs<br>BP) | $\Delta^{14}\text{C}^{2,3}$<br>(‰) | Ref. <sup>4</sup> | Comments <sup>5</sup> |
|---------------------|------------------------|-------------|--------------|----------------------------|---------------------------|---------------------------------------------|------------------------------------|-------------------|-----------------------|
| Kha-2-1             | Khardang Sise Island   | 72.95       | 124.2        | 3.1                        | peat inclusion            | 43550                                       | -996                               | 20                | min. age              |
| Kha-2-3             | Khardang Sise Island   | 72.95       | 124.2        | 4.3                        | peat inclusion            | 49030                                       | -998                               | 20                | min. age              |
| Kha-2-7             | Khardang Sise Island   | 72.95       | 124.2        | 5                          | peat moss                 | 52090                                       | -998                               | 20                | min. age              |
| Kha-2-13            | Khardang Sise Island   | 72.95       | 124.2        | 6.6                        | peat                      | 50200                                       | -998                               | 20                | min. age              |
| Kha-2-18            | Khardang Sise Island   | 72.95       | 124.2        | 8.6                        | plant fragments           | 29770                                       | -976                               | 20                |                       |
| Kha-2-24            | Khardang Sise Island   | 72.95       | 124.2        | 10.1                       | wood fragments            | 28050                                       | -970                               | 20                |                       |
| Kha-2-32            | Khardang Sise Island   | 72.95       | 124.2        | 16.9                       | plant remains             | 20100                                       | -918                               | 20                |                       |
| Muo-3-1             | Muostakh               | 71.61       | 129.9        | 0.5                        | plant remains             | 39110                                       | -992                               | 20                |                       |
| Muo-3-5             | Muostakh               | 71.61       | 129.9        | 1                          | twigs                     | 46780                                       | -997                               | 20                |                       |
| Muo-3-4             | Muostakh               | 71.61       | 129.9        | 2                          | twigs, moss               | 42800                                       | -995                               | 20                |                       |
| Muo-3-8             | Muostakh               | 71.61       | 129.9        | 5                          | plant remains             | 38620                                       | -992                               | 20                |                       |
| Muo-3-9             | Muostakh               | 71.61       | 129.9        | 7.5                        | carex, eriophorum         | 40340                                       | -993                               | 20                |                       |
| Muo-3-11            | Muostakh               | 71.61       | 129.9        | 9.7                        | twigs                     | 19560                                       | -913                               | 20                |                       |
| STO-1-6             | Stolbovoy Island       | 74.06       | 136.0        | 27                         | twigs, betula nana        | 50890                                       | -998                               | 20                | min. age              |
| STO-2-1             | Stolbovoy Island       | 74.06       | 136.0        | 10                         | plant remains             | 40830                                       | -994                               | 20                | min. age              |
| STO-2-2             | Stolbovoy Island       | 74.06       | 136.0        | 1                          | plant remains             | 36440                                       | -989                               | 20                | min. age              |
| STO-2-3             | Stolbovoy Island       | 74.06       | 136.0        | 3                          | twigs                     | 52250                                       | -999                               | 20                | min. age              |
| STO-3-1             | Stolbovoy Island       | 74.06       | 136.0        | 5                          | moss                      | 42430                                       | -995                               | 20                | min. age              |
| STO-3-5             | Stolbovoy Island       | 74.06       | 136.0        | 6                          | moss                      | 54940                                       | -999                               | 20                | min. age              |
| STO-3-8             | Stolbovoy Island       | 74.06       | 136.0        | 6.75                       | twigs, moss               | 36580                                       | -990                               | 20                |                       |
| BEL-2-1             | Bel'kovsky Island      | 75.37       | 135.5        | 2.7                        | twigs                     | 54390                                       | -999                               | 20                |                       |
| BEL-3-1             | Bel'kovsky Island      | 75.37       | 135.5        | 3.7                        | twigs                     | 47660                                       | -997                               | 20                |                       |
| BEL-3-3             | Bel'kovsky Island      | 75.37       | 135.5        | 4.6                        | moss                      | 39840                                       | -993                               | 20                | min. age              |
| BEL-7-1             | Bel'kovsky Island      | 75.37       | 135.5        | 1                          | twigs                     | 39980                                       | -993                               | 20                |                       |
| Mya-1-1             | N Kotel'ny Island,     | 76.17       | 139.0        | 1.5                        | lemming excrement, seeds, | 27860                                       | -969                               | 20                |                       |
| Kys-2-4             | SW Kotel'ny Island,    | 74.73       | 138.4        | 2.7                        | plant remains             | 45960                                       | -997                               | 20                |                       |
| KYS-2-5             | SW Kotel'ny Island (K. | 74.73       | 138.4        | 3                          | plant remains             | 52280                                       | -999                               | 20                |                       |

|           |                        |       |       |      |                             |       |      |    |          |
|-----------|------------------------|-------|-------|------|-----------------------------|-------|------|----|----------|
| Kys-2-6   | SW Kotel'ny Island (K. | 74.73 | 138.4 | 4    | moss                        | 52790 | -999 | 20 |          |
| Kys-2-10  | SW Kotel'ny Island (K. | 74.73 | 138.4 | 8.4  | plant remains               | 35370 | -988 | 20 |          |
| KLY-1-1   | Maly Lyakhovsky        | 74.25 | 140.3 | 5    | moss                        | 38290 | -992 | 20 | min. age |
| KLY-1-4   | Maly Lyakhovsky        | 74.25 | 140.3 | 3.3  | plant remains               | 34680 | -987 | 20 |          |
| KLY-1-9   | Maly Lyakhovsky        | 74.25 | 140.3 | 1.5  | twigs                       | 27980 | -969 | 20 |          |
| X-99-019  | Cape Svyatoy Nos       | 72.84 | 140.8 | 14.6 | plant remains               | 47640 | -997 | 20 | min. age |
| X-99-014  | Cape Svyatoy Nos       | 72.84 | 140.8 | 9.6  | plant remains               | 45350 | -996 | 20 |          |
| X-99-024  | Cape Svyatoy Nos       | 72.84 | 140.8 | 17   | plant remains               | 50290 | -998 | 20 | min. age |
| X-99-025  | Cape Svyatoy Nos       | 72.84 | 140.8 | 24   | plant remains               | 36080 | -989 | 20 |          |
| Oy7-08-32 | Oyogos Yar coast       | 72.68 | 143.5 | 9.5  | plant remains               | 41420 | -994 | 20 |          |
| Oy7-08-37 | Oyogos Yar coast       | 72.68 | 143.5 | 12   | peat inclusion              | 43860 | -996 | 20 |          |
| Oy7-08-38 | Oyogos Yar coast       | 72.68 | 143.5 | 15.5 | peat inclusion              | 44840 | -996 | 20 |          |
| Oy7-08-42 | Oyogos Yar coast       | 72.68 | 143.5 | 17.1 | plant remains               | 48540 | -998 | 20 |          |
| Oy7-08-47 | Oyogos Yar coast       | 72.68 | 143.5 | 19.2 | plant remains               | 40850 | -994 | 20 |          |
| Oy7-08-53 | Oyogos Yar coast       | 72.68 | 143.5 | 22   | peat inclusion              | 44900 | -996 | 20 |          |
| Oy7-08-57 | Oyogos Yar coast       | 72.68 | 143.5 | 24   | plant remains               | 38600 | -992 | 20 |          |
| Oy7-08-62 | Oyogos Yar coast       | 72.68 | 143.5 | 26.5 | grass roots                 | 34630 | -987 | 20 |          |
| Oy7-08-63 | Oyogos Yar coast       | 72.68 | 143.5 | 27   | grass roots                 | 32220 | -982 | 20 |          |
| MaK-1-9   | Cape Mamontov Klyk     | 73.61 | 117.1 | 4.3  | fine-sand silt, grass roots | 44520 | -996 | 21 | min. age |
| MaK-1-12  | Cape Mamontov Klyk     | 73.61 | 117.1 | 5.3  | peaty palaeosol             | 40410 | -993 | 21 |          |
| MaK-2-1   | Cape Mamontov Klyk     | 73.61 | 117.1 | 6.2  | sand, organic free          | 37100 | -990 | 21 | min. age |
| MaK-2-6   | Cape Mamontov Klyk     | 73.61 | 117.1 | 8.3  | peaty palaeosol,            | 42260 | -995 | 21 |          |
| MaK-2-9   | Cape Mamontov Klyk     | 73.61 | 117.1 | 9.8  | peaty palaeosol,            | 44310 | -996 | 21 |          |
| MaK-3-7   | Cape Mamontov Klyk     | 73.61 | 117.1 | 7    | peaty palaeosol, fine-sand  | 43510 | -996 | 21 |          |
| MaK-3-14  | Cape Mamontov Klyk     | 73.61 | 117.1 | 10.3 | peaty palaeosol, peat       | 43620 | -996 | 21 |          |
| MaK-3-17  | Cape Mamontov Klyk     | 73.61 | 117.1 | 13.2 | peaty palaeosol, peat       | 31250 | -980 | 21 |          |
| MaK-5-3   | Cape Mamontov Klyk     | 73.61 | 117.1 | 14.3 | palaeosol, peat inclusion,  | 24600 | -953 | 21 |          |
| MaK-6-4   | Cape Mamontov Klyk     | 73.61 | 117.1 | 16   | sandy silt, vertical grass  | 20640 | -924 | 21 |          |
| MaK-9-5   | Cape Mamontov Klyk     | 73.61 | 117.1 | 21.9 | fine-sand silt, wood        | 16510 | -873 | 21 |          |
| MaK-10-5  | Cape Mamontov Klyk     | 73.61 | 117.1 | 24.3 | cryoturbated palaeosol,     | 9480  | -694 | 21 |          |
| MaK-10-8  | Cape Mamontov Klyk     | 73.61 | 117.1 | 25.2 | cryoturbated palaeosol,     | 9510  | -695 | 21 |          |
| MaK-11-2  | Cape Mamontov Klyk     | 73.61 | 117.1 | 2.5  | sandy silt, plant remains   | 11060 | -749 | 21 |          |
| MaK-12-1  | Cape Mamontov Klyk     | 73.61 | 117.1 | 0.5  | peaty palaeosol, peat       | 27220 | -966 | 21 |          |

|               |                     |       |       |      |                              |       |      |    |                     |
|---------------|---------------------|-------|-------|------|------------------------------|-------|------|----|---------------------|
| MaK-13-7      | Cape Mamontov Klyk  | 73.61 | 117.1 | 4.3  | fine-sand silt, few organic, | 24150 | -951 | 21 |                     |
| MaK-15-5      | Cape Mamontov Klyk  | 73.61 | 117.1 | 6.6  | fine-sand to silt, wood      | 21890 | -935 | 21 |                     |
| MaK-16-5      | Cape Mamontov Klyk  | 73.61 | 117.1 | 9.3  | fine-sand to silt, wood      | 20180 | -919 | 21 |                     |
| MaK-17-3      | Cape Mamontov Klyk  | 73.61 | 117.1 | 11.5 | peaty palaeosol, wood        | 18920 | -906 | 21 |                     |
| MaK-17-7      | Cape Mamontov Klyk  | 73.61 | 117.1 | 13.6 | palaeosol                    | 17700 | -890 | 21 |                     |
| MaK-19-3      | Cape Mamontov Klyk  | 73.61 | 117.1 | 15.3 | sand, wood and plant         | 16350 | -870 | 21 |                     |
| MaK-19-7      | Cape Mamontov Klyk  | 73.61 | 117.1 | 17.1 | sandy silt                   | 14545 | -837 | 21 |                     |
| LD98 D6238    | Nagym, Island Ebe-  | 72.88 | 123.3 | 14   | Wood                         | 47480 | -997 | 22 | min. age            |
| L 98 D6237    | Nagym, Island Ebe-  | 72.88 | 123.3 | 11   | plant remains                | 42930 | -995 | 22 |                     |
| LD98 D6397    | Nagym, Island Ebe-  | 72.88 | 123.3 | 5.1  | root horizon                 | 56790 | -999 | 22 | min. age            |
| Nag 6+20-S-5  | Nagym, Island Ebe-  | 72.88 | 123.3 | 22   | Peat                         | 45640 | -997 | 22 | min. age; conv. 14C |
| LD98 D7.502   | Buor-Khaya, Island  | 72.33 | 126.3 | 14   | root horizon                 | 42910 | -995 | 22 |                     |
| BKh 3-S-25    | Buor-Khaya (K. S.)  | 72.33 | 126.3 | 31   | small twigs                  | 16980 | -880 | 22 |                     |
| BKh 3-S-23    | Buor-Khaya (K. S.)  | 72.33 | 126.3 | 28.5 | peat                         | 33490 | -985 | 22 |                     |
| BKh 3-S-19    | Buor-Khaya (K. S.)  | 72.33 | 126.3 | 24   | peat                         | 38020 | -991 | 22 |                     |
| BKh 3-S-14    | Buor-Khaya (K. S.)  | 72.33 | 126.3 | 21   | peat                         | 44470 | -996 | 22 |                     |
| BKh-O 65      | Buor-Khaya (K. S.)  | 72.33 | 126.3 | 20   | Equus sp. (radius)           | 34299 | -986 | 22 | conv. 14C           |
| BKh 3-S-14    | Buor-Khaya (K. S.)  | 72.33 | 126.3 | 15.9 | peat inclusion               | 50090 | -998 | 22 |                     |
| DY II-2       | Dzhangylakh/Khardan | 72.95 | 124.2 | 18.8 | plant remains                | 52690 | -999 | 22 | min. age; conv. 14C |
| DY II-2       | Dzhangylakh/Khardan | 72.95 | 124.2 |      | autochthonous peat           | 26420 | -963 | 22 | conv. 14C           |
| DY II-2       | Dzhangylakh/Khardan | 72.95 | 124.2 | 19.6 | autochthonous peat           | 25180 | -957 | 22 | conv. 14C           |
| Bkh2002 S20   | Kurungnakh          | 72.33 | 126.3 | 29.2 | wood                         | 32920 | -983 | 23 |                     |
| Bkh2002 S16   | Kurungnakh          | 72.33 | 126.3 | 29   | wood                         | 31960 | -981 | 23 |                     |
| Bkh2002 S22D  | Kurungnakh          | 72.33 | 126.3 | 26.3 | wood, leaves                 | 34830 | -987 | 23 |                     |
| Bkh2002 S48   | Kurungnakh          | 72.33 | 126.3 | 24   | wood                         | 40410 | -993 | 23 |                     |
| Bkh2002 S25D  | Kurungnakh          | 72.33 | 126.3 | 23   | wood, moss, coarse leaves    | 40020 | -993 | 23 |                     |
| Bkh2002 S46aD | Kurungnakh          | 72.33 | 126.3 | 19.8 | moss, leaf fragments         | 41220 | -994 | 23 |                     |
| BKh2002 S45aD | Kurungnakh          | 72.33 | 126.3 | 17.9 | plants                       | 41330 | -994 | 23 |                     |
| MKh99-5       | Bykovsky, Mamontov  | 71.81 | 128.4 | 35.5 | plant                        | 13920 | -824 | 24 |                     |
| Mkh99-8       | Bykovsky (M. K.)    | 71.81 | 128.4 | 33.5 | plant                        | 17160 | -882 | 24 |                     |
| Mkh99-9       | Bykovsky (M. K.)    | 71.81 | 128.4 | 32.6 | grass roots, wood            | 17350 | -885 | 24 |                     |
| Mkh99-23      | Bykovsky (M. K.)    | 71.81 | 128.4 | 31   | plant                        | 19340 | -910 | 24 |                     |
| Mkh99-10      | Bykovsky (M. K.)    | 71.81 | 128.4 | 30.2 | plant                        | 20600 | -923 | 24 |                     |



|               |                  |       |       |      |                   |       |      |    |                     |
|---------------|------------------|-------|-------|------|-------------------|-------|------|----|---------------------|
| Mkh99 R1-30m  | Bykovsky (M. K.) | 71.81 | 128.4 | 30   | insect remains    | 17160 | -882 | 24 |                     |
| Mkh 00-S-1    | Bykovsky (M. K.) | 71.81 | 128.4 | 30   | plant remains     | 18490 | -900 | 24 |                     |
| Mkh99-12      | Bykovsky (M. K.) | 71.81 | 128.4 | 28.8 | grass roots, wood | 22060 | -936 | 24 |                     |
| Mkh B18-28.5m | Bykovsky (M. K.) | 71.81 | 128.4 | 28.5 | insect remains    | 23750 | -948 | 24 |                     |
| Mkh99-14      | Bykovsky (M. K.) | 71.81 | 128.4 | 27.5 | grass roots       | 23800 | -949 | 24 |                     |
| Mkh99-16      | Bykovsky (M. K.) | 71.81 | 128.4 | 26.2 | grass roots, wood | 24470 | -953 | 24 |                     |
| Mkh99-18      | Bykovsky (M. K.) | 71.81 | 128.4 | 24.7 | grass roots, wood | 25570 | -959 | 24 |                     |
| Mkh-4.12-2a   | Bykovsky (M. K.) | 71.81 | 128.4 | 24.1 | peat              | 24460 | -953 | 24 |                     |
| Mkh99-90      | Bykovsky (M. K.) | 71.81 | 128.4 | 23.3 | grass roots       | 28110 | -970 | 24 |                     |
| Mkh-KB7-5a    | Bykovsky (M. K.) | 71.81 | 128.4 | 22.3 | wood              | 33580 | -985 | 24 |                     |
| Mkh-KB9-3     | Bykovsky (M. K.) | 71.81 | 128.4 | 22.2 | wood              | 28470 | -971 | 24 |                     |
| Mkh-KB7-3a    | Bykovsky (M. K.) | 71.81 | 128.4 | 20.7 | wood              | 33450 | -985 | 24 |                     |
| Mkh-4-14C-8   | Bykovsky (M. K.) | 71.81 | 128.4 | 20   | peat              | 28502 | -971 | 24 | conv. 14C           |
| Mkh-KB8-3     | Bykovsky (M. K.) | 71.81 | 128.4 | 18.5 | wood              | 35050 | -987 | 24 |                     |
| Mkh-KB6-3     | Bykovsky (M. K.) | 71.81 | 128.4 | 18.4 | peat, moss, grass | 36020 | -989 | 24 |                     |
| Mkh-KB8-4     | Bykovsky (M. K.) | 71.81 | 128.4 | 17.5 | wood, plant       | 34800 | -987 | 24 |                     |
| Mkh-KB4-6     | Bykovsky (M. K.) | 71.81 | 128.4 | 17.2 | wood              | 36800 | -990 | 24 |                     |
| Mkh-KB5-2     | Bykovsky (M. K.) | 71.81 | 128.4 | 17.2 | peat, plant       | 37010 | -990 | 24 |                     |
| Mkh-KB5-2     | Bykovsky (M. K.) | 71.81 | 128.4 | 17.2 | wood              | 37760 | -991 | 24 |                     |
| Mkh-BR2       | Bykovsky (M. K.) | 71.81 | 128.4 | 16.8 | shrub, wood       | 34740 | -987 | 24 |                     |
| Mkh-KB4-4     | Bykovsky (M. K.) | 71.81 | 128.4 | 16   | grass roots       | 35860 | -989 | 24 |                     |
| Mkh-HB2-4     | Bykovsky (M. K.) | 71.81 | 128.4 | 15.2 | peat              | 44980 | -996 | 24 | min. age, conv. 14C |
| Mkh-HB2-8     | Bykovsky (M. K.) | 71.81 | 128.4 | 15.6 | peat              | 41390 | -994 | 24 | conv. 14C           |
| Mkh-HB2-10    | Bykovsky (M. K.) | 71.81 | 128.4 | 15.8 | peat              | 41830 | -995 | 24 | min. age, conv. 14C |
| Mkh-HB2-2     | Bykovsky (M. K.) | 71.81 | 128.4 | 15   | peat              | 41740 | -994 | 24 |                     |
| Mkh-KB3-1     | Bykovsky (M. K.) | 71.81 | 128.4 | 15   | peat, wood        | 39320 | -993 | 24 |                     |
| Mkh-KB2-2     | Bykovsky (M. K.) | 71.81 | 128.4 | 14.8 | moss              | 44280 | -996 | 24 |                     |
| Mkh-KB1-4     | Bykovsky (M. K.) | 71.81 | 128.4 | 13.8 | wood              | 44580 | -996 | 24 |                     |
| Mkh-KB1-2     | Bykovsky (M. K.) | 71.81 | 128.4 | 13   | wood              | 48140 | -998 | 24 |                     |
| Mkh-K1-14C-2  | Bykovsky (M. K.) | 71.81 | 128.4 | 11   | wood              | 47900 | -997 | 24 |                     |
| Mkh-3         | Bykovsky (M. K.) | 71.81 | 128.4 | 10   | peat inclusion    | 45090 | -996 | 24 |                     |
| Mkh-K1-5      | Bykovsky (M. K.) | 71.81 | 128.4 | 10.5 | moss              | 45300 | -996 | 24 |                     |
| Mkh-K1-14C-1  | Bykovsky (M. K.) | 71.81 | 128.4 | 8.8  | grass             | 42630 | -995 | 24 |                     |

|                |                     |       |       |       |               |       |      |    |           |
|----------------|---------------------|-------|-------|-------|---------------|-------|------|----|-----------|
| Mkh-1.1-2      | Bykovsky (M. K.)    | 71.81 | 128.4 | 3.4   | grass roots   | 52870 | -999 | 24 |           |
| Mkh-1.2-14C-1  | Bykovsky (M. K.)    | 71.81 | 128.4 | 2.7   | peat, wood    | 58400 | -999 | 24 |           |
| Mkh-6.1-2      | Bykovsky (M. K.)    | 71.81 | 128.4 | 1.3   | wood          | 52900 | -999 | 24 | min. age  |
| Mkh-00-10-S-1  | Bykovsky (M. K.)    | 71.81 | 128.4 | 0.2   | plant remains | 54930 | -999 | 24 |           |
| Mkh-00-10-S-1  | Bykovsky (M. K.)    | 71.81 | 128.4 | 1.7   | plant remains | 57180 | -999 | 24 |           |
| Mkh-KB9-6      | Bykovsky (M. K.)    | 71.81 | 128.4 | 23.8  | plant         | 10470 | -730 | 24 |           |
| Mkh-KB-9-6     | Bykovsky (M. K.)    | 71.81 | 128.4 | 23.9  | wood          | 13230 | -808 | 24 |           |
| MB-6.3-1       | Bykovsky (M. K.)    | 71.81 | 128.4 | 1.5   | plant remains | 47400 | -997 | 25 |           |
| Mkh-KB2-2      | Bykovsky (M. K.)    | 71.81 | 128.4 | 14.8  | moss remains  | 44280 | -996 | 25 |           |
| Mkh-HB2-4      | Bykovsky (M. K.)    | 71.81 | 128.4 | 15.25 | peat          | 43080 | -995 | 25 | min. age  |
| Mkh-HB2-8      | Bykovsky (M. K.)    | 71.81 | 128.4 | 15.55 | peat          | 39500 | -993 | 25 | min. age  |
| Mkh-HB2-8      | Bykovsky (M. K.)    | 71.81 | 128.4 | 15.55 | peat          | 36350 | -989 | 25 |           |
| Mkh-HB2-10     | Bykovsky (M. K.)    | 71.81 | 128.4 | 15.75 | peat          | 38610 | -992 | 25 | min. age  |
| CM-1.2-1       | Bykovsky (Cape)     | 71.81 | 128.4 | 24    | plant remains | 35050 | -987 | 25 |           |
| Mkh99-4-KIA    | Bykovsky            | 71.81 | 128.4 | 36.4  | plant remains | 12790 | -798 | 25 |           |
| Khg-11/1-KIA   | Bykovsky (Khorogor) | 71.81 | 128.4 | 36    | peat          | 11545 | -764 | 26 |           |
| Khg-11/2-KIA   | Bykovsky (Khorogor) | 71.81 | 128.4 | 35.4  | peat          | 11710 | -768 | 26 |           |
| Khg-11/3-KIA-  | Bykovsky (Khorogor) | 71.81 | 128.4 | 35    | peat          | 12145 | -781 | 26 |           |
| Neb-1/10-KIA-  | Bykovsky (Khorogor) | 71.81 | 128.4 | 4.2   | twigs         | 10440 | -729 | 26 |           |
| Neb-1/6- KIA   | Bykovsky (Khorogor) | 71.81 | 128.4 | 3.45  | peat          | 10690 | -737 | 26 |           |
| Neb-1/2- KIA   | Bykovsky (Khorogor) | 71.81 | 128.4 | 2.6   | peat          | 11260 | -755 | 26 |           |
| Neb-1/1-KIA    | Bykovsky (Khorogor) | 71.81 | 128.4 | 2.1   | plant remains | 11400 | -759 | 26 |           |
| Khg-17/12-KIA  | Bykovsky (Khorogor) | 71.81 | 128.4 | 7     | peat          | 10120 | -718 | 26 |           |
| Khg-17/7-KIA   | Bykovsky (Khorogor) | 71.81 | 128.4 | 6     | twigs         | 10210 | -721 | 26 |           |
| Khg-17/1-KIA   | Bykovsky (Khorogor) | 71.81 | 128.4 | 4.8   | peat          | 10190 | -720 | 26 |           |
| Mkh02-1/1- KIA | Bykovsky peninsula  | 71.81 | 128.4 | 36.35 | twigs         | 10620 | -735 | 26 |           |
| Mkh02-1/3- KIA | Bykovsky peninsula  | 71.81 | 128.4 | 35.25 | twigs         | 12890 | -800 | 26 |           |
| Mkh02-1/5- KIA | Bykovsky peninsula  | 71.81 | 128.4 | 34.75 | twigs         | 14760 | -842 | 26 |           |
| B-S-5-KIA 8166 | Bykovsky peninsula  | 71.81 | 128.4 | 20    | wood          | 19330 | -910 | 26 |           |
| B-S-7-KIA 8165 | Bykovsky peninsula  | 71.81 | 128.4 | 10    | peat          | 53020 | -999 | 26 |           |
| 30/82-IM-767   | Bykovsky peninsula  | 71.81 | 128.4 | 20    | peat          | 28180 | -970 | 27 | conv. 14C |
| 19/82-IM-766   | Bykovsky peninsula  | 71.81 | 128.4 | 11    | peat          | 23700 | -948 | 27 | conv. 14C |
| 103/81-LU-1328 | Bykovsky peninsula  | 71.81 | 128.4 | 7     | peat          | 21630 | -933 | 27 | conv. 14C |

|                 |                    |       |       |      |                   |       |      |    |           |
|-----------------|--------------------|-------|-------|------|-------------------|-------|------|----|-----------|
| 103/81-LU-1130  | Bykovksy peninsula | 71.81 | 128.4 | 6    | peat              | 33040 | -984 | 27 | conv. 14C |
| 103/81-GIN-4597 | Bykovksy peninsula | 71.81 | 128.4 | 5    | plant material    | 40200 | -993 | 27 | conv. 14C |
| 103/81-GIN-4593 | Bykovksy peninsula | 71.81 | 128.4 | 4    | plant material    | 40400 | -993 | 27 | conv. 14C |
| 103/81-GIN-4391 | Bykovksy peninsula | 71.81 | 128.4 | 2.5  | plant material    | 40800 | -994 | 27 | conv. 14C |
| BK-21-1         | Buor-Khaya Cape    | 71.92 | 132.6 | 6    | bulk soil         | 48000 | -997 | *  | min. age  |
| BK-21-2         | Buor-Khaya Cape    | 71.92 | 132.6 | 3    | bulk soil         | 7960  | -631 | *  |           |
| BK-21-3         | Buor-Khaya Cape    | 71.92 | 132.6 | 1    | bulk soil         | 19450 | -912 | *  |           |
| BK-21-4         | Buor-Khaya Cape    | 71.92 | 132.6 | 1    | bulk soil         | 14300 | -832 | *  |           |
| Lena-64-5       | Olenek channel     | 72.32 | 126.2 | 17   | bulk soil         | 42500 | -995 | *  |           |
| Lena-64-7       | Olenek channel     | 72.32 | 126.2 | 2    | bulk soil         | 16500 | -872 | *  |           |
| Lena-64-8       | Olenek channel     | 72.32 | 126.2 | 1    | bulk soil         | 11450 | -761 | *  |           |
| Lena-64-9       | Olenek channel     | 72.32 | 126.2 | 0.5  | bulk soil         | 15800 | -861 | *  |           |
| M 2-5           | Muostakh           | 71.61 | 129.9 | 13   | bulk soil         | 17300 | -884 | *  |           |
| M 2-3           | Muostakh           | 71.61 | 129.9 | 16   | bulk soil         | 15750 | -860 | *  |           |
| M 5-3           | Muostakh           | 71.61 | 129.9 | 0.5  | bulk soil         | 25500 | -958 | *  |           |
| M 5-5           | Muostakh           | 71.61 | 129.9 | 24   | bulk soil         | 15400 | -854 | *  |           |
| M 6-3           | Muostakh           | 71.61 | 129.9 | 2    | bulk soil         | 19950 | -917 | *  |           |
| M 6-6           | Muostakh           | 71.61 | 129.9 | 23   | bulk soil         | 9380  | -690 | *  |           |
| M 7-5           | Muostakh           | 71.61 | 129.9 | 23   | bulk soil         | 35200 | -988 | *  |           |
| OS-66783        | Alaska; Itkillik   | 69.57 | -     | 3    | twigs             | 14300 | -832 | 28 |           |
| OS-66784        | Alaska; Itkillik   | 69.57 | -     | 4    | twigs             | 16550 | -873 | 28 |           |
| Alpha-3292      | Alaska; Itkillik   | 69.57 | -     | 7.4  | loess             | 12600 | -793 | 29 | 14C by    |
| OS-66785        | Alaska; Itkillik   | 69.57 | -     | 11   | twigs             | 29300 | -974 | 28 |           |
| OS-66786        | Alaska; Itkillik   | 69.57 | -     | 15   | twigs             | 26300 | -962 | 28 |           |
| USGS-1151       | Alaska; Itkillik   | 69.57 | -     | 15   | fine-grained org. | 28610 | -972 | 29 |           |
| I-11,530        | Alaska; Itkillik   | 69.57 | -     | 15   | fine-grained org. | 32300 | -982 | 29 |           |
| OS-66780        | Alaska; Itkillik   | 69.57 | -     | 16   | twigs             | 23900 | -949 | 28 |           |
| AA-2361         | Alaska; Itkillik   | 69.57 | -     | 17.2 | herbaceous plant  | 21800 | -934 | 29 |           |
| Alpha-3291      | Alaska; Itkillik   | 69.57 | -     | 17.4 | loess             | 34700 | -987 | 29 |           |
| Alpha-3290      | Alaska; Itkillik   | 69.57 | -     | 20   | loess             | 34700 | -987 | 29 |           |
| OS-66787        | Alaska; Itkillik   | 69.57 | -     | 23   | fine-grained org. | 41700 | -994 | 28 |           |
| OS-66777        | Alaska; Itkillik   | 69.57 | -     | 30.9 | peat              | 48000 | -997 | 28 | min. age  |
| OS-66778        | Alaska; Itkillik   | 69.57 | -     | 31.8 | fine-grained org. | 47500 | -997 | 28 | min. age  |

|                  |                     |       |       |        |                  |       |      |    |          |
|------------------|---------------------|-------|-------|--------|------------------|-------|------|----|----------|
| -                | Kolyma; Medvezhka   | 69.65 | 162.5 | >10m d | bulk soil        | 39860 | -993 | 30 |          |
| -                | Kolyma; Zelenyi Mys | 68.8  | 161.3 | >10m d | bulk soil        | 26700 | -964 | 30 |          |
| 363/55-HeI-3942  | Yamal: Seyaha       | 70    | 72    | 0.8d   | peat             | 11620 | -766 | 31 |          |
| 363/77-HeI-4023  | Yamal: Seyaha       | 70    | 72    | 3.2d   | peat             | 17290 | -884 | 31 |          |
| 279/10-GIN-2473  | Yamal: Seyaha       | 70    | 72    | 8.6d   | peat             | 22700 | -941 | 31 |          |
| 279/13-GIN-2475  | Yamal: Seyaha       | 70    | 72    | 10d    | peat             | 22600 | -940 | 31 |          |
| 363/207-GIN-     | Yamal: Seyaha       | 70    | 72    | 11d    | peat             | 22510 | -940 | 31 |          |
| 363/111-HeI-4046 | Yamal: Seyaha       | 70    | 72    | 12d    | peat             | 22850 | -942 | 31 |          |
| 279/16-GIN-2474  | Yamal: Seyaha       | 70    | 72    | 12d    | peat             | 23500 | -947 | 31 |          |
| 363/206-HeI-4043 | Yamal: Seyaha       | 70    | 72    | 12d    | peat             | 24460 | -953 | 31 |          |
| 363/62-HeI-4056  | Yamal: Seyaha       | 70    | 72    | 12.2d  | peat             | 25300 | -957 | 31 |          |
| 363/112-HeI-3943 | Yamal: Seyaha       | 70    | 72    | 15.2d  | peat             | 27890 | -969 | 31 |          |
| 279/23-GIN-2476  | Yamal: Seyaha       | 70    | 72    | 16.2d  | peat             | 24300 | -952 | 31 |          |
| 363/212-GIN-     | Yamal: Seyaha       | 70    | 72    | 20.5d  | peat             | 29500 | -975 | 31 |          |
| 279/28-GIN-2477  | Yamal: Seyaha       | 70    | 72    | 20.9d  | Peat             | 30100 | -977 | 31 |          |
| 363/211-HeI-201  | Yamal: Seyaha       | 70    | 72    | 20.9d  | Twig             | 31200 | -980 | 31 |          |
| 363/208-HeI-3950 | Yamal: Seyaha       | 70    | 72    | 20.9d  | Peat             | 36800 | -990 | 31 |          |
| GIN-4983         | Kular settlement    | 70.64 | 134.3 | 100    | Peat             | 40000 | -993 | 32 | min. age |
| GIN-4978         | Kular settlement    | 70.64 | 134.3 | 100    | Wood             | 43700 | -996 | 32 | min. age |
| GIN-4977         | Kular settlement    | 70.64 | 134.3 | 100.5  | Wood             | 41100 | -994 | 32 |          |
| GIN-4964         | Kular settlement    | 70.64 | 134.3 | 106    | Bone             | 40500 | -994 | 32 |          |
| GIN-4979         | Kular settlement    | 70.64 | 134.3 | 106.5  | Peat             | 35700 | -988 | 32 |          |
| GIN-4982         | Kular settlement    | 70.64 | 134.3 | 107    | Rootlets         | 42400 | -995 | 32 |          |
| GIN-4987         | Kular settlement    | 70.64 | 134.3 | 107    | Peat             | 33300 | -984 | 32 |          |
| GIN-4965         | Kular settlement    | 70.64 | 134.3 | 109    | Bone             | 38700 | -992 | 32 |          |
| GIN-4981         | Kular settlement    | 70.64 | 134.3 | 109    | Bone             | 37700 | -991 | 32 |          |
| GIN-3597         | Gudar settlement    | 70.89 | 78.5  | 2      | allochthonous OM | 12300 | -785 | 32 |          |
| GIN-3591         | Gudar settlement    | 70.89 | 78.5  | 3      | allochthonous OM | 13850 | -823 | 32 |          |
| GIN-3592         | Gudar settlement    | 70.89 | 78.5  | 5      | allochthonous OM | 14400 | -834 | 32 |          |
| GIN-3595         | Gudar settlement    | 70.89 | 78.5  | 2      | allochthonous OM | 13600 | -817 | 32 |          |
| GIN-3609         | Gudar settlement    | 70.89 | 78.5  | 3      | allochthonous OM | 14590 | -838 | 32 |          |
| GIN-3603         | Gudar settlement    | 70.89 | 78.5  | 5      | allochthonous OM | 14810 | -843 | 32 |          |
| GIN-3611         | Gudar settlement    | 70.89 | 78.5  | 2      | allochthonous OM | 12090 | -779 | 32 |          |

|             |                  |       |       |       |                            |       |      |    |
|-------------|------------------|-------|-------|-------|----------------------------|-------|------|----|
| GIN-3608    | Gudar settlement | 70.89 | 78.5  | 3     | allochthonous OM           | 13100 | -805 | 32 |
| GIN-3585    | Gudar settlement | 70.89 | 78.5  | 5     | allochthonous OM           | 15890 | -862 | 32 |
| GIN-3862    | Duvanny Yar      | 68.62 | 159.1 | 20    | Rootlets                   | 42600 | -995 | 32 |
| GIN-3864    | Duvanny Yar      | 68.62 | 159.1 | 21    | Rootlets                   | 38000 | -991 | 32 |
| GIN-3865    | Duvanny Yar      | 68.62 | 159.1 | 22    | Soil                       | 35100 | -987 | 32 |
| GIN-4015    | Duvanny Yar      | 68.62 | 159.1 | 25    | DAOPM                      | 37900 | -991 | 32 |
| GIN-4018    | Duvanny Yar      | 68.62 | 159.1 | 30    | DAOPM                      | 33400 | -984 | 32 |
| GIN-3861    | Duvanny Yar      | 68.62 | 159.1 | 38    | bone                       | 33800 | -985 | 32 |
| GIN-4016    | Duvanny Yar      | 68.62 | 159.1 | 38    | DAOPM                      | 27600 | -968 | 32 |
| GIN-4017    | Duvanny Yar      | 68.62 | 159.1 | 40    | DAOPM                      | 22000 | -936 | 32 |
| GIN-3868    | Duvanny Yar      | 68.62 | 159.1 | 45    | bone                       | 19480 | -912 | 32 |
| EP-941555   | Duvanny Yar      | 68.62 | 159.1 | 46    | soil                       | 13080 | -805 | 32 |
| MAG-592     | Duvanny Yar      | 68.62 | 159.1 | 42    | rootlets, stalks, branches | 17850 | -892 | 33 |
| GIN-3867    | Duvanny Yar      | 68.62 | 159.1 | 15    | bone                       | 28600 | -972 | 33 |
| GIN-4588    | Duvanny Yar      | 68.62 | 159.1 | 10    | black peat                 | 29900 | -976 | 33 |
| GIN-3998    | Duvanny Yar      | 68.62 | 159.1 | 9     | rootlets, stalks, branches | 30100 | -977 | 33 |
| GIN-3996    | Duvanny Yar      | 68.62 | 159.1 | 7.5   | rootlets, stalks, branches | 35400 | -988 | 33 |
| GIN-8922    | Utinoe           | 62.5  | -     | 334.8 | wood                       | 32100 | -982 | 34 |
| GIN-8925    | Utinoe           | 62.5  | -     | 334.9 | wood                       | 31390 | -980 | 34 |
| GIN-8929    | Utinoe           | 62.5  | -     | 334   | peat                       | 42120 | -995 | 34 |
| GIN-8930    | Utinoe           | 62.5  | -     | 332.8 | peat                       | 35500 | -988 | 34 |
| TO-6968     | Klondike, Canada | 63.92 | -     | -     | small twigs and grass      | 23520 | -947 | 35 |
| Beta-161238 | Klondike, Canada | 63.92 | -     | -     | grass                      | 23990 | -950 | 36 |
| Beta-161239 | Klondike, Canada | 63.92 | -     | -     | draba sp. Seed             | 24280 | -952 | 36 |
| TO-8304     | Klondike, Canada | 63.92 | -     | -     | peat                       | 21880 | -935 | 36 |
| TO-6967     | Klondike, Canada | 63.92 | -     | -     | small twigs and grass      | 22300 | -938 | 35 |
| BGS-1775    | Klondike, Canada | 63.92 | -     | -     | grass bed                  | 24025 | -950 | 37 |
| Beta-133410 | Klondike, Canada | 63.92 | -     | -     | peat                       | 25240 | -957 | 36 |
| BGS-1770    | Klondike, Canada | 63.92 | -     | -     | salix sp. piece            | 31000 | -979 | 37 |
| BGS-1768    | Klondike, Canada | 63.92 | -     | -     | grasses                    | 28450 | -971 | 37 |
| BGS-1754    | Klondike, Canada | 63.92 | -     | -     | grasses                    | 27150 | -966 | 37 |
| BGS-1758    | Klondike, Canada | 63.92 | -     | -     | salix sp. Piece            | 26240 | -962 | 37 |
| BGS-1755    | Klondike, Canada | 63.92 | -     | -     | grasses                    | 24025 | -950 | 37 |

|             |                   |       |       |      |                           |       |      |    |                |
|-------------|-------------------|-------|-------|------|---------------------------|-------|------|----|----------------|
| BGS-2015    | Klondike, Canada  | 63.92 | -     | -    | wood                      | 49000 | -998 | 38 | beta-decay age |
| BGS-2019    | Klondike, Canada  | 63.92 | -     | -    | rhizomes                  | 45500 | -997 | 38 | beta-decay age |
| BGS-2018    | Klondike, Canada  | 63.92 | -     | -    | wood                      | 40060 | -993 | 38 | beta-decay age |
| TO-6968     | Klondike, Canada  | 63.92 | -     | -    | twigs                     | 23520 | -947 | 38 |                |
| TO-6967     | Klondike, Canada  | 63.92 | -     | -    | twigs                     | 22300 | -938 | 38 |                |
| Beta-111606 | Klondike, Canada  | 63.92 | -     | -    | twigs/grass squirrel nest | 13910 | -824 | 38 | beta-decay age |
| TO-6869     | Klondike, Canada  | 63.92 | -     | -    | twigs from base           | 11620 | -766 | 38 |                |
| -           | Mamontova Gora    | 62.48 | 135.6 | 5.5  | silt?                     | 26800 | -965 | 39 |                |
| -           | Mamontova Gora    | 62.48 | 135.6 | 3    | silt?                     | 40600 | -994 | 39 |                |
| -           | Mamontova Gora    | 62.48 | 135.6 | 8    | silt?                     | 44000 | -996 | 39 |                |
| -           | Mamontova Gora    | 62.48 | 135.6 | 4d   |                           | 34020 | -986 | 39 |                |
| -           | Mamontova Gora    | 62.48 | 135.6 | 5d   | tree fragment             | 42150 | -995 | 39 |                |
| -           | Mamontova Gora    | 62.48 | 135.6 | 8d   | unidentified mammal ribs  | 46700 | -997 | 39 |                |
| -           | Mamontova Gora    | 62.48 | 135.6 | 9d   |                           | 56000 | -999 | 39 | min. age       |
| -           | Mamontova Gora    | 62.48 | 135.6 | 10d  |                           | 56000 | -999 | 39 | min. age       |
| -           | Mamontova Gora    | 62.48 | 135.6 | 12d  |                           | 56000 | -999 | 39 | min. age       |
| SI-1967     | Mamontova Gora    | 62.48 | 135.6 | 14d  | wood                      | 46000 | -997 | 39 | min. age       |
| -           | Mamontova Gora    | 62.48 | 135.6 | 17d  |                           | 56000 | -999 | 39 | min. age       |
| SI-1966     | Mamontova Gora    | 62.48 | 135.6 | 23d  | wood                      | 43500 | -996 | 39 | min. age       |
| -           | Mamontova Gora    | 62.48 | 135.6 | 26d  |                           | 56000 | -999 | 39 | min. age       |
| W-435       | Alaska, Eva Creek | 64.83 | -     | 2.5d | wood                      | 23300 | -945 | 39 |                |
| L-157A      | Alaska, Eva Creek | 64.83 | -     | Base | wood                      | 23000 | -943 | 39 | min. age       |
| L-163J      | Alaska, Eva Creek | 64.83 | -     | Base | wood                      | 30000 | -976 | 39 | min. age       |
| I-2116      | Alaska, Eva Creek | 64.83 | -     | Base | wood                      | 24400 | -952 | 39 |                |
| Hv-1328     | Alaska, Eva Creek | 64.83 | -     | -    | wood?                     | 56900 | -999 | 39 | min. age       |
| L-137X      | Alaska, Eva Creek | 64.83 | -     | -    | roots                     | 28000 | -970 | 39 | min. age       |
| KIA 19138   | Tumura River      | 63.6  | 129.9 | 1.2d | humic acids               | 13052 | -804 | 40 |                |
| KIA 19138   | Tumura River      | 63.6  | 129.9 | 1.2d | humins                    | 20285 | -920 | 40 |                |
| KIA 19139   | Tumura River      | 63.6  | 129.9 | 1.8d | roots                     | 9022  | -676 | 40 |                |
| Erl. 6152   | Tumura River      | 63.6  | 129.9 | 2.6d | humic acids               | 11801 | -771 | 40 |                |
| Erl. 6154   | Tumura River      | 63.6  | 129.9 | 2.6d | humins                    | 17713 | -890 | 40 |                |
| Erl. 6157   | Tumura River      | 63.6  | 129.9 | 2.6d | humins                    | 19301 | -910 | 40 |                |
| Erl. 6153   | Tumura River      | 63.6  | 129.9 | 2.6d | Roots                     | 9272  | -686 | 40 |                |

|           |              |      |       |       |               |       |      |    |          |
|-----------|--------------|------|-------|-------|---------------|-------|------|----|----------|
| KIA 19140 | Tumura River | 63.6 | 129.9 | 3d    | humins        | 29756 | -975 | 40 |          |
| Erl. 6155 | Tumura River | 63.6 | 129.9 | 3d    | roots         | 9275  | -686 | 40 |          |
| Erl. 6155 | Tumura River | 63.6 | 129.9 | 3d    | roots         | 9240  | -685 | 40 |          |
| Erl. 6156 | Tumura River | 63.6 | 129.9 | 3d    | roots         | 8945  | -673 | 40 |          |
| Erl. 5203 | Tumura River | 63.6 | 129.9 | 4.4d  | wood          | 46000 | -997 | 40 | min. age |
| KIA 18805 | Tumura River | 63.6 | 129.9 | 5d    | bone collagen | 47110 | -997 | 40 |          |
| KIA 18805 | Tumura River | 63.6 | 129.9 | 5d    | bone collagen | 49690 | -998 | 40 |          |
| Erl. 5203 | Tumura River | 63.6 | 129.9 | 8.2d  | wood          | 48000 | -997 | 40 | min. age |
| Erl. 5204 | Tumura River | 63.6 | 129.9 | 10.9d | wood          | 51000 | -998 | 40 | min. age |

<sup>1</sup> with “d” indicating depth instead of height.

<sup>2</sup> error and/or standard deviations can be found in the cited references.

<sup>3</sup> the references mostly report <sup>14</sup>C ages (in yrs BP), we have converted these ages to Fraction modern ( $Fm = e^{-age/8033}$ ) and subsequently into  $\Delta^{14}C$  (‰;  $\Delta^{14}C = [Fm \times [e^{\lambda(1950-Yc)} - 1] \times 1000$ , where lambda is  $1/(\text{true mean-life of } ^{14}\text{C})$  or  $1/8267$ , and Yc year of collection (assumed 1990).

<sup>4</sup> with \* indicating Sánchez-García *et al.*, unpublished results.

<sup>5</sup> with “conv. 14C” meaning conventional <sup>14</sup>C dating (not AMS), “min. age” meaning minimal age.

**Table S5 | Fractions of topsoil-PF, ICD-PF and marine OC in surface sediment OC in the East Siberian Arctic Shelf.**

Calculated with a Monte Carlo simulation strengthened dual-carbon isotopic mixing model.

| Depth<br>(m)      | Station | Fraction of sediment OC (mean) |        |        | (stdev)        |        |        |
|-------------------|---------|--------------------------------|--------|--------|----------------|--------|--------|
|                   |         | Topsoil-<br>PF                 | ICD-PF | Marine | Topsoil-<br>PF | ICD-PF | Marine |
| Laptev Sea        |         |                                |        |        |                |        |        |
| 11                | YS-4    | 16%                            | 46%    | 38%    | 11%            | 4.7%   | 10%    |
| 16                | YS-6    | 25%                            | 48%    | 27%    | 14%            | 5.4%   | 12%    |
| 14                | TB-19   | 19%                            | 64%    | 17%    | 10%            | 4.8%   | 8.4%   |
| 16                | TB-24   | 20%                            | 57%    | 23%    | 12%            | 5.1%   | 10%    |
| 5                 | TB-28   | 27%                            | 52%    | 21%    | 13%            | 5.4%   | 11%    |
| 16                | TB-34   | 22%                            | 55%    | 24%    | 13%            | 5.2%   | 10%    |
| 20                | TB-38   | 27%                            | 49%    | 23%    | 14%            | 5.5%   | 11%    |
| 22                | TB-43   | 22%                            | 54%    | 24%    | 13%            | 5.2%   | 10%    |
| 6                 | TB-46   | 35%                            | 43%    | 22%    | 15%            | 5.7%   | 12%    |
| 18                | TB-51   | 25%                            | 51%    | 24%    | 14%            | 5.4%   | 11%    |
| 11                | TB-59   | 27%                            | 50%    | 23%    | 14%            | 5.4%   | 11%    |
| 19                | YS-13   | 23%                            | 56%    | 21%    | 12%            | 5.2%   | 10%    |
| 7                 | YS-14   | 28%                            | 51%    | 21%    | 14%            | 5.4%   | 11%    |
| 27                | YS-19   | 21%                            | 58%    | 21%    | 12%            | 5.2%   | 10%    |
| East Siberian Sea |         |                                |        |        |                |        |        |
| 20                | YS-22   | 19%                            | 73%    | 7.8%   | 7.9%           | 4.2%   | 6.0%   |
| 16                | YS-26   | 17%                            | 76%    | 7.1%   | 7.3%           | 4.0%   | 5.5%   |
| 28                | YS-28   | 17%                            | 70%    | 13%    | 9.1%           | 4.5%   | 7.3%   |
| 9                 | YS-30   | 22%                            | 69%    | 8.5%   | 8.7%           | 4.4%   | 6.6%   |
| 20                | YS-31   | 22%                            | 64%    | 14%    | 10%            | 4.9%   | 8.3%   |
| 10                | YS-34B  | 32%                            | 55%    | 13%    | 12%            | 5.1%   | 9.3%   |
| 32                | YS-36   | 24%                            | 56%    | 20%    | 12%            | 5.3%   | 10%    |
| 36                | YS-38   | 23%                            | 48%    | 29%    | 14%            | 5.2%   | 11%    |
| 49                | YS-40   | 13%                            | 46%    | 41%    | 10%            | 4.4%   | 8.5%   |
| 51                | YS-93   | 14%                            | 43%    | 43%    | 11%            | 4.5%   | 8.9%   |
| 45                | YS-95   | 15%                            | 54%    | 31%    | 11%            | 4.6%   | 9.0%   |
| 36                | YS-116  | 12%                            | 71%    | 16%    | 8.2%           | 4.2%   | 7.0%   |
| 33                | YS-120  | 13%                            | 63%    | 24%    | 9.3%           | 4.3%   | 7.9%   |
| 200               | YS-86   | 4.8%                           | 42%    | 53%    | 4.2%           | 3.8%   | 4.7%   |
| 63                | YS-90   | 10%                            | 36%    | 54%    | 7.8%           | 4.4%   | 7.1%   |
| 69                | YS-102  | 5.3%                           | 51%    | 44%    | 4.5%           | 3.5%   | 4.7%   |



**Table S6 | Summary of coastal and shelf carbon fluxes in the East Siberian Arctic Shelf.**

All values are in Tg OC, and reported as mean± 95% confidence intervals.

|                                                            | Fraction of ICD-PF to OC input onto shelf |         |         |
|------------------------------------------------------------|-------------------------------------------|---------|---------|
|                                                            | 50%-50%                                   | 25%-75% | 75%-25% |
| Burial on shelf <sup>1</sup>                               | 20±8                                      | 20±8    | 20±8    |
| <i>Released onto shelf</i>                                 |                                           |         |         |
| From coastal erosion                                       | 11±4                                      | 5.6±2   | 17±6    |
| From seafloor erosion                                      | 11±4                                      | 17±6    | 5.6±2   |
| Total                                                      | 22±8                                      | 22±8    | 22±8    |
| <i>Degradation</i>                                         |                                           |         |         |
| Released as CO <sub>2</sub> in shelf waters <sup>2</sup>   | 2.5±2                                     | 2.5±2   | 2.5±2   |
| Released as CO <sub>2</sub> on coastal slopes <sup>3</sup> | 22±8                                      | 11±4    | 32±12   |
| Total                                                      | 24±8                                      | 13±4    | 35±12   |
| <i>Annual thaw/erosion of Pleistocene carbon</i>           |                                           |         |         |
| From coastal erosion                                       | 33±9                                      | 16±5    | 49±14   |
| From seafloor erosion                                      | 11±4                                      | 17±6    | 5.6±2   |
| Total                                                      | 44±10                                     | 33±8    | 55±14   |

<sup>1</sup> Calculated according to: annual OC flux (36±17 gOC/m<sup>2</sup>/yr; (mean±95% confidence interval)) x fraction accumulation bottoms (0.6; depth>30m where no resuspension occurs and pelite dominates) x average fraction ICD-OC (57±1.6%; (mean±95% confidence interval)). The total was multiplied by 1.6 to extrapolate to the entire ESAS, i.e. including the Laptev Sea.

<sup>2</sup> Annual POC degradation (mean±stdev) in the ESAS<sup>41</sup>.

<sup>3</sup> Assuming 66±16% (mean±stdev) loss of ICD-OC onland as CO<sub>2</sub> (i.e. 34±16% is released as OC onto shelf)

**Table S7 | Elemental, isotopic and molecular composition of the Muostakh Island soil samples.**

The concentration of terrestrial lipid biomarkers is expressed as mg/g OC. The  $\delta^{13}\text{C}$  and  $^{14}\text{C}$  age are measured relative to VPDB and Oxalic Acid I standards, respectively.

|                                                                | Slope 2 |       |       | Slope 5 |       | Slope 6 |       | Slope 7 |
|----------------------------------------------------------------|---------|-------|-------|---------|-------|---------|-------|---------|
|                                                                | 2-5     | 2-3   | 2-2   | 5-3     | 5-5   | 6-3     | 6-6   | 7-5     |
| <b>Bulk properties</b>                                         |         |       |       |         |       |         |       |         |
| Profile height                                                 | 13      | 16    | 18    | 1       | 24    | 2       | 23    | 23      |
| Soil TOC (%)                                                   | 0.69    | 1.0   | 3.5   | 0.74    | 1.5   | 1.1     | 3.3   | 2.5     |
| TOC/TN                                                         | 7.5     | 9.2   | 18    | 7.7     | 10    | 9.1     | 16    | 13      |
| $\delta^{13}\text{C}$ (‰)                                      | -23.9   | -24.2 | -28.8 | -23.5   | -24.3 | -24.0   | -27.0 | -27.2   |
| $^{14}\text{C}$ age (kyrs)                                     | 17      | 16    | 5.1   | 26      | 15    | 20      | 9.4   | 35      |
| $\Delta^{14}\text{C}$ -OC (‰)                                  | -885    | -860  | -474  | -959    | -854  | -917    | -691  | -988    |
| <b><i>n</i>-alkanes</b>                                        |         |       |       |         |       |         |       |         |
| HMW <i>n</i> -alkanes <sup>a</sup>                             | 0.86    | 0.77  | 3.3   | 0.69    | 0.91  | 0.64    | 2.7   | 14      |
| CPI 21-31 <sup>b</sup>                                         | 7.0     | 6.7   | 3.9   | 3.2     | 3.0   | 11      | 7.1   | 4.0     |
| even $\leq\text{C}_{20}$ /odd $\geq\text{C}_{27}$ <sup>c</sup> | 0.71    | 0.70  | 0.12  | 0.51    | 0.39  | 0.27    | 0.025 | 0.51    |
| <b><i>n</i>-alkanoic acids</b>                                 |         |       |       |         |       |         |       |         |
| HMW <i>n</i> -alkanoic acids <sup>a</sup>                      | 1.6     | 3.0   | 23    | 0.76    | 2.8   | 11      | 7.0   | 6.3     |
| CPI 20-30 <sup>b</sup>                                         | 4.1     | 6.7   | 5.9   | 4.0     | 4.7   | 7.2     | 4.4   | 3.0     |
| HMW <i>n</i> -alkanoic acids/HMW <i>n</i> -alkanes             | 1.8     | 3.9   | 7.2   | 1.1     | 3.0   | 18      | 2.6   | 0.45    |
| <b><i>n</i>-alkanols</b>                                       |         |       |       |         |       |         |       |         |
| HMW <i>n</i> -alkanols <sup>a</sup>                            | 1.1     | 3.2   | 31    | 0.31    | 0.31  | 1.4     | 6.6   | 11      |
| CPI 20-30 <sup>b</sup>                                         | 14      | 15    | 6.6   | 9.3     | 6.3   | 18      | 27.   | 62      |
| $\beta$ -sitosterol <sup>f</sup> /HMW <i>n</i> -alkanes        | 0       | 2.2   | 2.0   | 0       | 0     | 1.4     | 2.8   | 4.1     |

<sup>a</sup> HMW is high-molecular weight, sum of C<sub>20</sub>-C<sub>34</sub> for *n*-alkanes, sum of C<sub>20</sub>-C<sub>30</sub> for *n*-alkanoic acids and sum of C<sub>20</sub>-C<sub>30</sub> for *n*-alkanols.

<sup>b</sup> Calculated CPI<sub>*i-n*</sub>, carbon preference index, =  $\frac{1}{2} \frac{\sum(X_i+X_{i+2}+\dots+X_n)}{\sum(X_{i-1}+X_{i+1}+\dots+X_{n-1})} + \frac{1}{2} \frac{\sum(X_i+X_{i+2}+\dots+X_n)}{\sum(X_{i+1}+X_{i+3}+\dots+X_{n+1})}$ , where X is concentration.

<sup>c</sup> Even and low-molecular weight *n*-alkanes (C<sub>16</sub>-C<sub>20</sub>) to odd and high-molecular weight *n*-alkanes (C<sub>27</sub>-C<sub>31</sub>).

<sup>f</sup> 24-Ethylcholest-5-en-3 $\beta$ -ol.

**Table S8 | CO<sub>2</sub> fluxes on Muostakh Island.**CO<sub>2</sub> fluxes (mmol/m<sup>2</sup>/day) recorded along five slope transects (n=28) on Muostakh Island.

| CO <sub>2</sub> transects | n | Lat<br>(°N) | Long<br>(°E) | CO <sub>2</sub> flux<br>(mmol/m <sup>2</sup> /day) |       |
|---------------------------|---|-------------|--------------|----------------------------------------------------|-------|
|                           |   |             |              | mean                                               | stdev |
| Transect 1                | 3 | 71.6125     | 129.9376     | 17                                                 | 36    |
|                           | 3 | 71.6126     | 129.9378     | 3.2                                                | 0.5   |
|                           | 3 | 71.6129     | 129.9379     | 12                                                 | 2.0   |
|                           | 3 | 71.6130     | 129.9379     | 4.0                                                | 2.6   |
|                           | 3 | 71.6130     | 129.9382     | 14                                                 | 5.3   |
| Transect 2                | 3 | 71.6124     | 129.9442     | 6.0                                                | 3.5   |
|                           | 3 | 71.6125     | 129.9442     | 4.9                                                | 1.0   |
|                           | 3 | 71.6126     | 129.9442     | 10                                                 | 3.8   |
| Transect 3                | 2 | 71.6093     | 129.9466     | 13                                                 | 62    |
|                           | 2 | 71.6094     | 129.9469     | 12                                                 | 4.3   |
|                           | 2 | 71.6096     | 129.9470     | 8.2                                                | 0.6   |
|                           | 2 | 71.6096     | 129.9473     | 15                                                 | 11    |
|                           | 2 | 71.6096     | 129.9473     | 23                                                 | 12    |
|                           | 2 | 71.6099     | 129.9509     | 18                                                 | 0.6   |
|                           | 2 | 71.6104     | 129.9525     | 12                                                 | 1.2   |
|                           | 2 | 71.6106     | 129.9533     | 28                                                 | 8.6   |
|                           | 2 | 71.6108     | 129.9533     | 26                                                 | 14    |
|                           | 2 | 71.6108     | 129.9533     | 5.2                                                | 0     |
|                           | 3 | 71.6104     | 129.9525     | 6.3                                                | 2.5   |
|                           | 3 | 71.6106     | 129.9533     | 18                                                 | 3.6   |
|                           | 3 | 71.6108     | 129.9533     | 13                                                 | 1.8   |
|                           | 3 | 71.6108     | 129.9533     | 17                                                 | 2.2   |
|                           | 3 | 71.6106     | 129.9533     | 27                                                 | 3.0   |
|                           | 3 | 71.6108     | 129.9533     | 4.0                                                | 1.3   |
|                           | 3 | 71.6108     | 129.9533     | 440                                                | 25    |
| Transect 4                | 3 | 71.6101     | 129.9569     | 24                                                 | 13    |
|                           | 1 | 71.6101     | 129.9568     | 48                                                 | 0     |
| Transect 5                | 3 | 71.6029     | 129.9799     | 110                                                | 30    |
|                           | 3 | 71.6029     | 129.9797     | 8.9                                                | 4.4   |
|                           | 3 | 71.6028     | 129.9796     | 17                                                 | 9.7   |
|                           | 3 | 71.6027     | 129.9794     | 96                                                 | 18    |
|                           | 3 | 71.6027     | 129.9792     | 9.2                                                | 4.9   |
|                           | 3 | 71.6025     | 129.9792     | 15                                                 | 6.7   |
|                           | 3 | 71.6019     | 129.9753     | 27                                                 | 8.7   |
|                           | 3 | 71.6014     | 129.9658     | 21                                                 | 10    |
|                           | 3 | 71.6013     | 129.9653     | 220                                                | 71    |
|                           | 3 | 71.6014     | 129.9650     | 17                                                 | 2.2   |

**Table S9 | Individual data for bulk geochemical data for surface sediments in the East Siberian Arctic Shelf.**

For sediment OC and TOC/TN, outliers have been excluded (3 and 8 values respectively). Outliers (marked with \*) are defined as observations farther than 1.5 x interquartile range from the closest quartile.

| Year | Station | Lat   | Long   | Depth | Sed.OC |        | $\delta^{13}\text{C}$ |   | TOC/TN | $\Delta^{14}\text{C}$ |   |
|------|---------|-------|--------|-------|--------|--------|-----------------------|---|--------|-----------------------|---|
|      |         | (°N)  | (°E)   |       | m      | mg/gdw | stdev                 | ‰ |        | stdev                 | ‰ |
| 2003 | 4       | 73.04 | 146.82 | 11    | 13.0   | -      | -25.1                 | - | 15.1   | -                     | - |
| 2003 | 5       | 73.61 | 146.83 | 12    | 8.2    | -      | -24.6                 | - | 14.4   | -                     | - |
| 2003 | 6       | 74.27 | 146.83 | 16.4  | 6.1    | -      | -24.4                 | - | 13.1   | -                     | - |
| 2003 | 7       | 74.84 | 146.84 | 11    | 5.1    | -      | -23.8                 | - | 16.3   | -                     | - |
| 2003 | 8       | 73.86 | 148.92 | 16    | 6.0    | -      | -24.0                 | - | 14.8   | -                     | - |
| 2003 | 9       | 73.57 | 151.00 | 16    | 13.0   | -      | -24.5                 | - | 21.4*  | -                     | - |
| 2003 | 10      | 72.92 | 151.00 | 15    | 6.7    | -      | -25.2                 | - | 13.1   | -                     | - |
| 2003 | 11      | 72.00 | 150.99 | 9     | 17.9   | -      | -25.6                 | - | 16.1   | -                     | - |
| 2003 | 12      | 71.63 | 152.49 | 14    | 20.4   | -      | -25.7                 | - | 13.9   | -                     | - |
| 2003 | 13      | 71.24 | 153.99 | 14    | 18.9   | -      | -25.6                 | - | 12.1   | -                     | - |
| 2003 | 14      | 71.62 | 154.99 | 15    | 11.3   | -      | -25.5                 | - | 11.6   | -                     | - |
| 2003 | 15      | 71.99 | 155.99 | 17.5  | 11.2   | -      | -25.2                 | - | 12.0   | -                     | - |
| 2003 | 16      | 71.66 | 157.34 | 12    | 12.7   | -      | -26.0                 | - | 12.7   | -                     | - |
| 2003 | 17      | 71.43 | 158.90 | 14    | 10.6   | -      | -25.3                 | - | 11.7   | -                     | - |
| 2003 | 18      | 71.00 | 159.89 | 10    | 13.0   | -      | -25.6                 | - | 11.6   | -                     | - |
| 2003 | 19      | 70.43 | 161.20 | 10    | 6.9    | -      | -25.3                 | - | 10.9   | -                     | - |
| 2003 | 20      | 70.00 | 161.20 | 11    | 12.4   | -      | -25.4                 | - | 11.7   | -                     | - |
| 2003 | 21      | 70.33 | 162.49 | 9     | 11.1   | -      | -25.0                 | - | 11.1   | -                     | - |
| 2003 | 22      | 70.72 | 163.99 | 11.2  | 3.9    | -      | -24.2                 | - | 10.6   | -                     | - |
| 2003 | 23      | 70.43 | 166.99 | 25    | 10.1   | -      | -24.6                 | - | 10.2   | -                     | - |
| 2003 | 24      | 70.15 | 172.15 | 31    | 14.5   | -      | -24.0                 | - | 10.2   | -                     | - |
| 2003 | 25      | 70.01 | 176.31 | 38    | 15.3   | -      | -23.0                 | - | 9.21   | -                     | - |
| 2003 | 26      | 69.92 | 176.07 | 11.8  | 11.0   | -      | -24.3                 | - | 10.8   | -                     | - |
| 2003 | 27      | 70.24 | 177.16 | 50    | 17.2   | -      | -22.4                 | - | 10.5   | -                     | - |
| 2003 | 28      | 70.48 | 178.00 | 50    | 14.9   | -      | -21.9                 | - | 9.36   | -                     | - |
| 2003 | 29      | 70.67 | 178.47 | 42    | 11.2   | -      | -22.4                 | - | 9.90   | -                     | - |
| 2003 | 30      | 70.48 | 171.99 | 35    | 9.3    | -      | -23.8                 | - | 8.57   | -                     | - |
| 2003 | 31      | 70.85 | 167.99 | 41.6  | 16.0   | -      | -24.2                 | - | 9.46   | -                     | - |
| 2003 | 32      | 70.63 | 164.99 | 18    | 8.7    | -      | -24.9                 | - | 11.9   | -                     | - |
| 2003 | 33      | 71.12 | 161.99 | 20    | 8.7    | -      | -24.9                 | - | 10.1   | -                     | - |
| 2003 | 34      | 72.49 | 154.00 | 29    | 13.6   | -      | -25.2                 | - | 12.9   | -                     | - |
| 2003 | 35      | 72.59 | 151.00 | 15.5  | 10.2   | -      | -25.1                 | - | 12.0   | -                     | - |
| 2003 | 36      | 72.97 | 148.34 | 10    | 14.8   | -      | -25.6                 | - | 14.0   | -                     | - |
| 2003 | 43      | 73.02 | 143.14 | 12    | 8.9    | -      | -24.6                 | - | 13.5   | -                     | - |
| 2004 | 25      | 73.14 | 134.64 | 18    | 5.5    | -      | -25.8                 | - | 11.0   | -                     | - |
| 2004 | 27      | 73.85 | 137.16 | 22    | 16.2   | -      | -26.0                 | - | 10.1   | -                     | - |
| 2004 | 29      | 74.76 | 140.00 | 9     | 7.0    | -      | -25.8                 | - | 10.0   | -                     | - |
| 2004 | 30      | 74.49 | 140.23 | 27    | 20.8   | -      | -26.4                 | - | 11.0   | -                     | - |
| 2004 | 31      | 74.33 | 140.38 | 10    | 10.0   | -      | -27.1                 | - | 12.5   | -                     | - |

|      |     |       |        |      |       |   |       |   |       |   |   |
|------|-----|-------|--------|------|-------|---|-------|---|-------|---|---|
| 2004 | 36  | 74.80 | 146.50 | 14   | 11.0  | - | -25.2 | - | 12.2  | - | - |
| 2004 | 37  | 74.16 | 146.67 | 15   | 10.2  | - | -26.0 | - | 20.4* | - | - |
| 2004 | 38  | 73.52 | 146.84 | 12   | 6.4   | - | -26.3 | - | 10.7  | - | - |
| 2004 | 39  | 72.86 | 147.00 | 9    | 15.0  | - | -27.3 | - | 13.6  | - | - |
| 2004 | 40  | 72.80 | 148.50 | 11   | 13.0  | - | -27.0 | - | 11.8  | - | - |
| 2004 | 42  | 72.45 | 150.00 | 9    | 8.5   | - | -27.1 | - | 12.1  | - | - |
| 2004 | 43  | 72.10 | 150.76 | 7    | 9.0   | - | -27.0 | - | 12.9  | - | - |
| 2004 | 44  | 71.75 | 151.51 | 10   | 19.0  | - | -27.4 | - | 12.7  | - | - |
| 2004 | 46  | 71.03 | 153.00 | 9    | 12.8  | - | -26.8 | - | 11.6  | - | - |
| 2004 | 47  | 71.70 | 153.00 | 15   | 19.0  | - | -26.9 | - | 11.2  | - | - |
| 2004 | 49  | 72.37 | 153.00 | 19   | 6.0   | - | -26.0 | - | 10.0  | - | - |
| 2004 | 51  | 73.00 | 153.00 | 21   | 7.0   | - | -25.6 | - | 10.0  | - | - |
| 2004 | 53  | 72.30 | 156.26 | 19   | 10.7  | - | -26.3 | - | 10.7  | - | - |
| 2004 | 55  | 71.50 | 156.26 | 12.5 | 12.0  | - | -26.6 | - | 10.0  | - | - |
| 2004 | 56  | 71.59 | 157.84 | 15   | 4.8   | - | -26.1 | - | 9.60  | - | - |
| 2004 | 58  | 72.02 | 159.42 | 21   | 16.0  | - | -28.3 | - | 13.3  | - | - |
| 2004 | 60  | 72.50 | 161.50 | 23   | 9.5   | - | -25.9 | - | 8.64  | - | - |
| 2004 | 62  | 71.70 | 161.16 | 20   | 7.3   | - | -25.9 | - | 8.11  | - | - |
| 2004 | 64  | 71.02 | 161.07 | 12   | 12.1  | - | -26.1 | - | 9.31  | - | - |
| 2004 | 65  | 70.73 | 161.14 | 9    | 5.7   | - | -26.0 | - | 9.50  | - | - |
| 2004 | 66  | 70.45 | 161.20 | 9.4  | 9.0   | - | -26.3 | - | 1.00* | - | - |
| 2004 | 67  | 70.17 | 161.27 | 9    | 37.3* | - | -25.6 | - | 124*  | - | - |
| 2004 | 68  | 69.83 | 161.35 | 9    | 18.0  | - | -27.0 | - | 1.00* | - | - |
| 2004 | 69  | 69.73 | 162.37 | 12   | 16.4  | - | -27.3 | - | 14.9  | - | - |
| 2004 | 72  | 70.00 | 165.14 | 24   | 13.0  | - | -26.0 | - | 9.29  | - | - |
| 2004 | 74  | 70.09 | 167.53 | 35   | 8.6   | - | -25.2 | - | 8.60  | - | - |
| 2004 | 75  | 70.18 | 168.49 | 39   | 13.9  | - | -26.0 | - | 10.7  | - | - |
| 2004 | 78  | 69.63 | 169.55 | 15   | 11.4  | - | -25.3 | - | 10.4  | - | - |
| 2004 | 79  | 69.38 | 169.42 | 14   | 4.8   | - | -24.4 | - | 8.00  | - | - |
| 2004 | 80  | 69.13 | 169.29 | 10   | 1.8   | - | -24.4 | - | 9.00  | - | - |
| 2004 | 81  | 68.99 | 169.65 | 12   | 6.4   | - | -26.9 | - | 12.8  | - | - |
| 2004 | 82  | 68.86 | 170.02 | 10.4 | 1.3   | - | -25.0 | - | 13.0  | - | - |
| 2004 | 83  | 69.02 | 170.30 | 13   | 9.9   | - | -26.7 | - | 12.4  | - | - |
| 2004 | 84  | 69.18 | 170.58 | 11   | 18.0  | - | -26.9 | - | 12.9  | - | - |
| 2004 | 85  | 69.18 | 169.88 | 15   | 13.1  | - | -26.1 | - | 10.1  | - | - |
| 2004 | 86  | 69.35 | 170.16 | 15.4 | 23.4  | - | -26.4 | - | 10.2  | - | - |
| 2004 | 87  | 69.52 | 170.43 | 11   | 17.0  | - | -27.0 | - | 12.1  | - | - |
| 2004 | 88  | 69.55 | 169.92 | 15.8 | 25.3  | - | -26.5 | - | 9.73  | - | - |
| 2004 | 89  | 69.88 | 169.77 | 16   | 10.0  | - | -25.8 | - | 10.0  | - | - |
| 2004 | 91  | 70.21 | 170.39 | 31   | 20.1  | - | -25.8 | - | 9.14  | - | - |
| 2004 | 95  | 69.96 | 176.11 | 22   | 20.5  | - | -24.2 | - | 0.86* | - | - |
| 2004 | 96  | 70.10 | 176.63 | 46   | 12.6  | - | -23.6 | - | 0.88* | - | - |
| 2004 | 97  | 70.27 | 177.20 | 50   | 18.6  | - | -23.1 | - | 7.75  | - | - |
| 2004 | 99  | 70.42 | 177.78 | 47.8 | 21.9  | - | -22.9 | - | 7.55  | - | - |
| 2004 | 100 | 70.58 | 178.29 | 47.2 | 17.4  | - | -22.8 | - | 7.57  | - | - |
| 2004 | 101 | 70.74 | 178.66 | 30   | 13.8  | - | -24.2 | - | 7.67  | - | - |
| 2004 | 102 | 70.51 | 177.57 | 44   | 19.7  | - | -22.9 | - | 6.35  | - | - |
| 2004 | 103 | 70.50 | 176.10 | 45   | 18.7  | - | -23.4 | - | 6.45  | - | - |
| 2004 | 104 | 70.50 | 174.63 | 41.6 | 12.6  | - | -23.9 | - | 7.88  | - | - |

|      |       |       |        |      |      |     |       |     |      |      |   |
|------|-------|-------|--------|------|------|-----|-------|-----|------|------|---|
| 2004 | 105   | 70.48 | 173.13 | 37.2 | 14.6 | -   | -24.3 | -   | 7.68 | -    | - |
| 2004 | 106   | 70.48 | 171.60 | 30.8 | 16.3 | -   | -24.9 | -   | 7.41 | -    | - |
| 2004 | 107   | 70.48 | 170.12 | 26   | 16.1 | -   | -25.4 | -   | 7.67 | -    | - |
| 2004 | 108   | 70.46 | 168.62 | 28   | 19.6 | -   | -25.4 | -   | 7.26 | -    | - |
| 2004 | 110   | 70.83 | 162.88 | 17.6 | 4.9  | -   | -25.5 | -   | 8.17 | -    | - |
| 2004 | 111   | 73.43 | 155.08 | 34.2 | 10.3 | -   | -25.1 | -   | 7.92 | -    | - |
| 2004 | 112   | 74.14 | 153.31 | 18.4 | 8.2  | -   | -25.1 | -   | 8.20 | -    | - |
| 2004 | 113   | 74.56 | 153.43 | 14.4 | 9.4  | -   | -25.0 | -   | 9.40 | -    | - |
| 2004 | 114   | 75.00 | 153.53 | 16   | 6.6  | -   | -25.2 | -   | 9.43 | -    | - |
| 2007 | TB-01 | 74.84 | 129.04 | 41   | 13.1 | 0.3 | -25.4 | 0.1 | 8.73 | -    | - |
| 2007 | TB-02 | 74.83 | 130.01 | 37   | 16.8 | 0.2 | -25.7 | 0.1 | 8.40 | -    | - |
| 2007 | TB-03 | 74.84 | 131.00 | 28   | 14.8 | 0.4 | -25.7 | 0.2 | 9.87 | -    | - |
| 2007 | TB-04 | 74.59 | 130.99 | 27   | 6.1  | 0.3 | -25.6 | 0.1 | 15.3 | -    | - |
| 2007 | TB-05 | 74.59 | 130.02 | 32   | 15.2 | 0.1 | -25.7 | 0.1 | 10.9 | -    | - |
| 2007 | TB-06 | 74.59 | 129.03 | 26   | 11.3 | 0.5 | -25.6 | 0.1 | 10.3 | -    | - |
| 2007 | TB-07 | 74.33 | 128.99 | 19   | 0.5  | 0.1 | -26.1 | 1.3 | 5.00 | -    | - |
| 2007 | TB-08 | 74.33 | 130.03 | 22   | 1.0  | 0.1 | -24.9 | 0.5 | 10.0 | -    | - |
| 2007 | TB-09 | 74.34 | 131.00 | 26   | 3.9  | 0.2 | -25.7 | 0.1 | 13.0 | -    | - |
| 2007 | TB-10 | 74.08 | 130.99 | 24   | 2.1  | 1.3 | -26   | 0.8 | 10.5 | -    | - |
| 2007 | TB-11 | 74.08 | 130.01 | 15.5 | 1.7  | 0.3 | -25.9 | 0.7 | 8.50 | -    | - |
| 2007 | TB-12 | 74.08 | 129.00 | 16   | 0.5  | 0.1 | -25.1 | 0.3 | 5.00 | -    | - |
| 2007 | TB-13 | 73.83 | 129.00 | 16   | 0.3  | 0.2 | -25.1 | 1.1 | 3.00 | -    | - |
| 2007 | TB-14 | 73.83 | 130.00 | 19   | 3.0  | 0.2 | -25.7 | 0.2 | 15.0 | -    | - |
| 2007 | TB-15 | 73.83 | 131.00 | 20   | 1.9  | 0.1 | -25.5 | 0.4 | 9.50 | -    | - |
| 2007 | TB-16 | 73.58 | 130.99 | 20   | 16.5 | 0.3 | -25.4 | 0.1 | 9.17 | -    | - |
| 2007 | TB-17 | 73.58 | 130.00 | 14   | 0.9  | 0.2 | -25.7 | 0.7 | 9.00 | -    | - |
| 2007 | TB-18 | 73.58 | 129.00 | 21   | 19.2 | 0.4 | -26.2 | 0.1 | 12.0 | -    | - |
| 2007 | TB-19 | 73.33 | 130.14 | 25   | 13.6 | 0.3 | -25.9 | 0.1 | 11.3 | -    | - |
| 2007 | TB-20 | 73.32 | 131.00 | 25   | 18.5 | 0.1 | -25.8 | 0.1 | 9.74 | -    | - |
| 2008 | 4     | 75.99 | 129.98 | 50   | 13.4 | -   | -24.3 | -   | 8.03 | -437 | 3 |
| 2008 | 6     | 74.72 | 130.02 | 32   | 18.6 | -   | -25.6 | -   | 9.46 | -465 | 3 |
| 2008 | 13    | 71.97 | 131.70 | 19   | 18.9 | -   | -25.9 | -   | 10.7 | -543 | 2 |
| 2008 | 14    | 71.63 | 130.05 | 7    | 19.1 | -   | -26.2 | -   | 13.9 | -504 | 2 |
| 2008 | 19    | 73.11 | 137.30 | 27   | 18.2 | -   | -25.8 | -   | 10.0 | -557 | 3 |
| 2008 | 20    | 73.31 | 139.89 | 8    | 3.9  | 0.1 | -26.9 | 0.1 | 6.93 | -    | - |
| 2008 | 21    | 73.09 | 140.35 | 15   | 8.1  | 0.2 | -27.0 | 0.1 | 8.20 | -    | - |
| 2008 | 22    | 72.88 | 140.63 | 20   | 11.8 | 0.3 | -27.4 | 0.2 | 9.28 | -716 | 3 |
| 2008 | 23    | 72.79 | 142.67 | 10   | 9.1  | 1.5 | -27.2 | 0.1 | 8.86 | -    | - |
| 2008 | 24    | 73.05 | 142.67 | 15   | 7.7  | 0.3 | -27.4 | 0.1 | 9.02 | -    | - |
| 2008 | 25    | 73.14 | 142.67 | 10   | 10.2 | 0.3 | -27.3 | 0.1 | 8.91 | -    | - |
| 2008 | 26    | 72.46 | 150.60 | 16   | 8.7  | 0.2 | -27.4 | 0.1 | 8.42 | -741 | 2 |
| 2008 | 27    | 72.57 | 152.37 | 18   | 4.1  | 0.1 | -26.2 | 0.2 | 6.88 | -    | - |
| 2008 | 28    | 72.65 | 154.19 | 28   | 8.7  | 0.1 | -26.2 | 0.1 | 6.94 | -672 | 2 |
| 2008 | 29    | 72.20 | 153.17 | 18   | 6.3  | 0.3 | -26.6 | 0.1 | 7.83 | -    | - |
| 2008 | 30    | 71.36 | 152.15 | 9    | 13.5 | 0.2 | -27.4 | 0.1 | 8.85 | -682 | 2 |
| 2008 | 31    | 71.59 | 161.69 | 20   | 5.6  | 0.1 | -26.5 | 0.1 | 6.60 | -624 | 4 |
| 2008 | 32    | 70.57 | 161.22 | 9    | 4.2  | 0.2 | -26.4 | 0.1 | 6.60 | -    | - |
| 2008 | 33    | 70.17 | 161.22 | 8    | 4.0  | 0.5 | -26.2 | 0.2 | 6.48 | -    | - |
| 2008 | 35    | 69.82 | 164.06 | 31   | 12.2 | 3.4 | -26.8 | 0.5 | 8.93 | -    | - |

|      |       |       |        |      |      |      |       |      |      |      |   |
|------|-------|-------|--------|------|------|------|-------|------|------|------|---|
| 2008 | 36    | 69.82 | 166.00 | 32   | 8.0  | 0.1  | -26.0 | 0.1  | 6.80 | -547 | 2 |
| 2008 | 37    | 70.13 | 168.01 | 42   | 9.4  | 0.4  | -25.7 | 0.1  | 6.67 | -    | - |
| 2008 | 38    | 70.70 | 169.13 | 36   | 10.0 | 0.1  | -25.3 | 0.2  | 6.47 | -462 | 3 |
| 2008 | 39    | 71.22 | 169.37 | 44   | 12.3 | 0.1  | -24.3 | 0.2  | 6.12 | -    | - |
| 2008 | 40    | 71.48 | 170.55 | 49   | 13.6 | 0.3  | -23.9 | 0.1  | 6.17 | -425 | 3 |
| 2008 | 41    | 71.97 | 171.79 | 43   | 13.2 | 0.3  | -23.9 | 0.2  | 6.08 | -    | - |
| 2008 | 86    | 75.30 | 174.40 | 200  | 8.9  | 0.2  | -21.2 | 0.1  | 5.24 | -391 | 3 |
| 2008 | 88    | 75.10 | 172.19 | 142  | 10.4 | 0.1  | -21.5 | 0.1  | 5.48 | -    | - |
| 2008 | 90    | 74.67 | 172.39 | 63   | 8.5  | 0.1  | -22.4 | 0.1  | 5.62 | -332 | 3 |
| 2008 | 91    | 74.43 | 170.85 | 56   | 8.2  | 0.2  | -23.3 | 0.2  | 5.64 | -    | - |
| 2008 | 93    | 74.42 | 166.00 | 51   | 8.0  | 0.1  | -23.8 | 0.1  | 5.45 | -398 | 3 |
| 2008 | 95    | 74.42 | 161.34 | 45   | 9.7  | 0.4  | -24.8 | 0.1  | 5.72 | -511 | 3 |
| 2008 | 97    | 75.27 | 160.89 | 49   | 8.5  | 0.1  | -24.1 | 0.1  | 5.53 | -    | - |
| 2008 | 98    | 75.55 | 160.75 | 48   | 7.7  | 0.1  | -23.9 | 0.1  | 5.43 | -    | - |
| 2008 | 99    | 75.17 | 163.59 | 50   | 7.7  | 0.1  | -23.4 | 0.1  | 5.45 | -    | - |
| 2008 | 100   | 75.72 | 164.08 | 58   | 7.6  | 0.1  | -22.4 | 0.1  | 5.76 | -    | - |
| 2008 | 102   | 76.56 | 160.07 | 69   | 7.7  | 0.1  | -22.3 | 0.2  | 5.51 | -476 | 3 |
| 2008 | 104   | 76.93 | 155.17 | 57   | 9.1  | 0.1  | -23.1 | 0.1  | 5.85 | -    | - |
| 2008 | 106   | 76.97 | 150.29 | 43   | 8.7  | 0.1  | -23.8 | 0.1  | 6.06 | -    | - |
| 2008 | 111   | 75.00 | 160.01 | 46   | 8.0  | 0.1  | -24.2 | 0.2  | 5.94 | -    | - |
| 2008 | 112   | 74.83 | 159.33 | 42   | 8.8  | 0.1  | -24.6 | 0.1  | 6.17 | -    | - |
| 2008 | 116   | 74.58 | 157.00 | 36   | 6.0  | 0.1  | -25.5 | 0.2  | 6.63 | -682 | 2 |
| 2008 | 118   | 74.33 | 156.01 | 28   | 7.1  | 0.1  | -25.2 | 0.1  | 6.79 | -    | - |
| 2008 | 120   | 73.29 | 155.17 | 33   | 9.9  | 0.1  | -25.0 | 0.2  | 6.70 | -600 | 2 |
| 2008 | 131   | 76.40 | 125.47 | 50   | 4.0  | 0.1  | -24.3 | 0.2  | 6.62 | -    | - |
| 2008 | 22B   | 72.89 | 140.62 | 15   | 10.7 | 1.1  | -27.4 | 0.1  | 9.51 | -    | - |
| 2008 | 34B   | 69.71 | 162.69 | 10   | 11.2 | 0.3  | -27.3 | 0.2  | 9.96 | -554 | 2 |
| 2008 | TB-17 | 72.29 | 132.92 | 21   | 15.1 | -    | -25.6 | -    | 9.94 | -    | - |
| 2008 | TB-18 | 72.17 | 133.00 | 16   | 8.0  | 0.08 | -25.7 | 0.23 | 10.5 | -    | - |
| 2008 | TB-19 | 72.09 | 132.78 | 14   | 4.7  | -    | -26.0 | -    | 11.2 | -622 | 3 |
| 2008 | TB-22 | 71.88 | 132.11 | 15   | 3.2  | 0.04 | -25.2 | 0.28 | 9.44 | -    | - |
| 2008 | TB-23 | 71.83 | 131.67 | 20   | 15.9 | -    | -25.8 | -    | 10.0 | -    | - |
| 2008 | TB-24 | 71.76 | 131.17 | 16   | 18.7 | -    | -25.6 | -    | 10.3 | -549 | 2 |
| 2008 | TB-25 | 71.72 | 130.83 | 13   | 18.8 | -    | -25.8 | -    | 10.6 | -    | - |
| 2008 | TB-26 | 71.69 | 130.58 | 12.5 | 20.9 | -    | -25.8 | -    | 12.2 | -    | - |
| 2008 | TB-27 | 71.66 | 130.33 | 10.6 | 18.6 | 0.02 | -25.9 | 0.08 | 13.1 | -    | - |
| 2008 | TB-28 | 71.62 | 130.04 | 5.3  | 21.5 | -    | -26.2 | -    | 14.6 | -513 | 3 |
| 2008 | TB-30 | 71.87 | 129.83 | 5    | 20.4 | -    | -26.0 | -    | 14.9 | -    | - |
| 2008 | TB-31 | 71.86 | 130.32 | 12   | 22.5 | -    | -25.9 | -    | 12.1 | -    | - |
| 2008 | TB-32 | 71.86 | 131.09 | 12   | 18.4 | 0.01 | -25.6 | 0.02 | 10.5 | -    | - |
| 2008 | TB-33 | 72.09 | 131.09 | 14.5 | 21.9 | 0.02 | -25.8 | 0.13 | 11.0 | -    | - |
| 2008 | TB-34 | 72.29 | 131.09 | 16   | 18.5 | 0.02 | -25.7 | 0.05 | 11.8 | -526 | 3 |
| 2008 | TB-35 | 72.46 | 131.09 | 16.5 | 22.2 | 0.01 | -25.9 | 0.07 | 11.9 | -    | - |
| 2008 | TB-36 | 72.59 | 131.10 | 17   | 21.2 | -    | -25.9 | -    | 12.1 | -    | - |
| 2008 | TB-37 | 72.71 | 131.09 | 18.5 | 23.9 | -    | -26.0 | -    | 12.4 | -    | - |
| 2008 | TB-38 | 72.93 | 130.84 | 20   | 23.5 | -    | -26.0 | -    | 12.3 | -482 | 3 |
| 2008 | TB-39 | 72.93 | 130.66 | 20   | 23.0 | -    | -25.9 | -    | 13.3 | -    | - |
| 2008 | TB-40 | 72.93 | 130.03 | 6    | 15.0 | -    | -26.0 | -    | 13.1 | -    | - |
| 2008 | TB-43 | 72.89 | 131.93 | 21.8 | 15.6 | -    | -25.6 | -    | 10.3 | -517 | 2 |

|      |       |       |        |      |       |      |       |      |       |      |   |
|------|-------|-------|--------|------|-------|------|-------|------|-------|------|---|
| 2008 | TB-44 | 72.71 | 131.66 | 18.8 | 20.9  | -    | -25.9 | -    | 11.4  | -    | - |
| 2008 | TB-45 | 72.70 | 130.66 | 15   | 22.4  | -    | -25.9 | -    | 12.4  | -    | - |
| 2008 | TB-46 | 72.70 | 130.18 | 6    | 25.8  | -    | -26.5 | -    | 14.3  | -436 | 2 |
| 2008 | TB-48 | 72.59 | 130.12 | 6.5  | 38.1* | -    | -26.6 | -    | 16.2* | -    | - |
| 2008 | TB-49 | 72.59 | 130.68 | 14   | 20.2  | -    | -25.8 | -    | 12.5  | -    | - |
| 2008 | TB-50 | 72.59 | 131.66 | 18   | 18.2  | -    | -25.7 | -    | 11.4  | -    | - |
| 2008 | TB-51 | 72.46 | 131.66 | 18   | 21.4  | -    | -25.8 | -    | 11.3  | -495 | 4 |
| 2008 | TB-52 | 72.45 | 130.67 | 12.5 | 13.4  | -    | -25.8 | -    | 11.6  | -    | - |
| 2008 | TB-53 | 72.28 | 130.07 | 8.5  | 95.1* | 1.42 | -27.5 | 0.09 | 23.2* | -    | - |
| 2008 | TB-54 | 72.28 | 130.59 | 10   | 8.8   | -    | -25.7 | -    | 11.7  | -    | - |
| 2008 | TB-55 | 72.29 | 131.72 | 17   | 19.7  | -    | -25.8 | -    | 11.1  | -    | - |
| 2008 | TB-56 | 72.10 | 131.72 | 15   | 18.0  | -    | -25.7 | -    | 10.4  | -    | - |
| 2008 | TB-57 | 72.00 | 131.77 | 10   | 18.3  | -    | -25.7 | -    | 10.5  | -    | - |
| 2008 | TB-59 | 72.09 | 130.06 | 11   | 18.7  | -    | -26.0 | -    | 12.7  | -493 | 3 |



**Table S10 | Raw radiochronological data for East Siberian Arctic Shelf sediment cores.**

| slice<br>interval | <sup>210</sup> Pb |        | <sup>226</sup> Ra |        | <sup>210</sup> Pb <sub>xs</sub> |        | porosity | Dry<br>density |                   | <sup>210</sup> Pb <sub>xs</sub> |                   |
|-------------------|-------------------|--------|-------------------|--------|---------------------------------|--------|----------|----------------|-------------------|---------------------------------|-------------------|
|                   | cm                | Bq/gdw | stdev             | Bq/gdw | stdev                           | Bq/gdw |          | stdev          | g/cm <sup>3</sup> | stdev                           | Bq/m <sup>2</sup> |
| <b>YS-22</b>      |                   |        |                   |        |                                 |        |          |                |                   |                                 |                   |
| 0-1               | 0.051             | 0.003  | 0.022             | 0.002  | 0.029                           | 0.004  | 0.39     | 2.7            | 0.36              | 484                             | 87                |
| 1-2               | 0.056             | 0.004  | 0.030             | 0.002  | 0.026                           | 0.004  | 0.36     | 2.7            | 0.36              | 451                             | 97                |
| 2-3               | 0.054             | 0.004  | 0.025             | 0.002  | 0.029                           | 0.005  | 0.34     | 2.7            | 0.36              | 520                             | 110               |
| 3-4               | 0.060             | 0.003  | 0.021             | 0.002  | 0.039                           | 0.003  | 0.32     | 2.7            | 0.36              | 721                             | 110               |
| 4-5               | 0.074             | 0.005  | 0.022             | 0.003  | 0.052                           | 0.005  | 0.34     | 2.7            | 0.36              | 931                             | 160               |
| 5-6               | 0.052             | 0.005  | 0.026             | 0.003  | 0.026                           | 0.005  | 0.36     | 2.7            | 0.36              | 453                             | 110               |
| 6-7               | 0.051             | 0.003  | 0.023             | 0.002  | 0.028                           | 0.003  | 0.35     | 2.7            | 0.36              | 485                             | 85                |
| 7-8               | 0.066             | 0.004  | 0.028             | 0.002  | 0.038                           | 0.004  | 0.34     | 2.7            | 0.36              | 680                             | 120               |
| 8-9               | 0.065             | 0.003  | 0.027             | 0.002  | 0.039                           | 0.004  | 0.37     | 2.7            | 0.36              | 654                             | 110               |
| 9-10              | 0.054             | 0.004  | 0.025             | 0.002  | 0.029                           | 0.004  | 0.34     | 2.7            | 0.36              | 515                             | 110               |
| 10-11             | 0.054             | 0.004  | 0.002             | 0.002  | 0.052                           | 0.004  | 0.33     | 2.7            | 0.36              | 929                             | 150               |
| 11-12             | 0.054             | 0.003  | 0.026             | 0.002  | 0.029                           | 0.004  | 0.28     | 2.7            | 0.36              | 553                             | 100               |
| 12-13             | 0.068             | 0.004  | 0.012             | 0.002  | 0.057                           | 0.004  | 0.29     | 2.7            | 0.36              | 1090                            | 170               |
| 13-14             | 0.072             | 0.004  | 0.023             | 0.002  | 0.049                           | 0.005  | 0.37     | 2.7            | 0.36              | 832                             | 140               |
| 14-15             | 0.078             | 0.004  | 0.028             | 0.002  | 0.049                           | 0.004  | 0.42     | 2.7            | 0.36              | 776                             | 120               |
| <b>YS-26</b>      |                   |        |                   |        |                                 |        |          |                |                   |                                 |                   |
| 0-1               | 0.071             | 0.005  | 0.035             | 0.003  | 0.036                           | 0.006  | 0.56     | 2.7            | 0.36              | 432                             | 90                |
| 1-2               | 0.062             | 0.004  | 0.036             | 0.003  | 0.026                           | 0.005  | 0.45     | 2.7            | 0.36              | 386                             | 86                |
| 2-3               | 0.039             | 0.003  | 0.037             | 0.002  | 0.003                           | 0.003  | 0.33     | 2.7            | 0.36              | 46.6                            | 62                |
| 3-4               | 0.063             | 0.005  | 0.015             | 0.003  | 0.048                           | 0.003  | 0.38     | 2.7            | 0.36              | 804                             | 140               |
| 4-5               | 0.058             | 0.004  | 0.018             | 0.003  | 0.040                           | 0.005  | 0.43     | 2.7            | 0.36              | 614                             | 120               |
| 5-6               | 0.067             | 0.005  | 0.036             | 0.003  | 0.030                           | 0.006  | 0.45     | 2.7            | 0.36              | 453                             | 110               |
| 6-7               | 0.054             | 0.003  | 0.021             | 0.002  | 0.033                           | 0.004  | 0.40     | 2.7            | 0.36              | 531                             | 93                |
| 7-8               | 0.039             | 0.003  | 0.018             | 0.002  | 0.021                           | 0.004  | 0.31     | 2.7            | 0.36              | 399                             | 92                |
| 8-9               | 0.053             | 0.004  | 0.023             | 0.003  | 0.030                           | 0.005  | 0.36     | 2.7            | 0.36              | 518                             | 110               |
| 9-10              | 0.062             | 0.003  | 0.023             | 0.002  | 0.039                           | 0.003  | 0.37     | 2.7            | 0.36              | 653                             | 100               |
| 10-11             | 0.046             | 0.003  | 0.026             | 0.002  | 0.020                           | 0.004  | 0.34     | 2.7            | 0.36              | 350                             | 83                |
| 11-12             | 0.043             | 0.003  | 0.033             | 0.002  | 0.011                           | 0.004  | 0.33     | 2.7            | 0.36              | 191                             | 75                |
| 12-13             | 0.053             | 0.003  | 0.046             | 0.002  | 0.008                           | 0.004  | 0.34     | 2.7            | 0.36              | 137                             | 77                |
| 13-14             | 0.053             | 0.003  | 0.041             | 0.002  | 0.012                           | 0.003  | 0.32     | 2.7            | 0.36              | 217                             | 65                |
| <b>YS-35</b>      |                   |        |                   |        |                                 |        |          |                |                   |                                 |                   |
| 0-1               | 0.052             | 0.004  | 0.023             | 0.001  | 0.030                           | 0.004  | 0.44     | 2.7            | 0.36              | 443                             | 88                |
| 1-2               | 0.033             | 0.004  | 0.020             | 0.001  | 0.013                           | 0.004  | 0.36     | 2.7            | 0.36              | 218                             | 80                |
| 2-3               | 0.035             | 0.002  | 0.022             | 0.001  | 0.012                           | 0.002  | 0.35     | 2.7            | 0.36              | 214                             | 49                |
| 3-4               | 0.037             | 0.003  | 0.026             | 0.001  | 0.011                           | 0.004  | 0.35     | 2.7            | 0.36              | 189                             | 69                |
| 4-5               | 0.028             | 0.004  | 0.027             | 0.001  | 0.001                           | 0.004  | 0.34     | 2.7            | 0.36              | 23.7                            | 79                |
| 5-6               | 0.027             | 0.004  | 0.024             | 0.001  | 0.003                           | 0.005  | 0.29     | 2.7            | 0.36              | 61.7                            | 91                |
| 6-7               | 0.028             | 0.002  | 0.027             | 0.001  | 0.001                           | 0.002  | 0.29     | 2.7            | 0.36              | 12.3                            | 37                |
| 7-8               | 0.032             | 0.004  | 0.027             | 0.001  | 0.004                           | 0.004  | 0.32     | 2.7            | 0.36              | 81.4                            | 75                |
| 8-9               | 0.030             | 0.004  | 0.036             | 0.001  | 0                               | 0.004  | 0.35     | 2.7            | 0.36              | 0                               | 0                 |
| 9-10              | 0.032             | 0.004  | 0.036             | 0.001  | 0                               | 0.005  | 0.32     | 2.7            | 0.36              | 0                               | 0                 |
| 10-11             | 0.030             | 0.002  | 0.035             | 0.001  | 0                               | 0.002  | 0.26     | 2.7            | 0.36              | 0                               | 0                 |

| <b>YS-36</b> |       |       |       |       |       |       |      |     |      |      |     |
|--------------|-------|-------|-------|-------|-------|-------|------|-----|------|------|-----|
| 0-1          | 0.044 | 0.004 | 0.028 | 0.002 | 0.016 | 0.004 | 0.54 | 2.7 | 0.36 | 200  | 57  |
| 1-2          | 0.054 | 0.004 | 0.026 | 0.001 | 0.028 | 0.004 | 0.47 | 2.7 | 0.36 | 403  | 79  |
| 2-3          | 0.044 | 0.004 | 0.023 | 0.001 | 0.021 | 0.004 | 0.43 | 2.7 | 0.36 | 317  | 79  |
| 3-4          | 0.039 | 0.003 | 0.026 | 0.001 | 0.013 | 0.003 | 0.41 | 2.7 | 0.36 | 208  | 63  |
| 4-5          | 0.041 | 0.004 | 0.032 | 0.001 | 0.010 | 0.004 | 0.39 | 2.7 | 0.36 | 158  | 69  |
| 5-6          | 0.036 | 0.004 | 0.031 | 0.001 | 0.006 | 0.004 | 0.36 | 2.7 | 0.36 | 98.9 | 74  |
| 6-7          | 0.041 | 0.003 | 0.033 | 0.001 | 0.009 | 0.003 | 0.34 | 2.7 | 0.36 | 153  | 53  |
| 7-8          | 0.034 | 0.003 | 0.032 | 0.001 | 0.002 | 0.003 | 0.33 | 2.7 | 0.36 | 35.7 | 58  |
| 8-9          | 0.030 | 0.004 | 0.026 | 0.001 | 0.004 | 0.004 | 0.32 | 2.7 | 0.36 | 70.0 | 68  |
| 9-10         | 0.022 | 0.003 | 0.027 | 0.001 | 0     | 0.003 | 0.32 | 2.7 | 0.36 | 0    | 0   |
| 10-11        | 0.030 | 0.002 | 0.028 | 0.001 | 0.001 | 0.002 | 0.31 | 2.7 | 0.36 | 0    | 0   |
| 11-12        | 0.027 | 0.004 | 0.029 | 0.001 | 0     | 0.004 | 0.31 | 2.7 | 0.36 | 0    | 0   |
| 12-13        | 0.026 | 0.002 | 0.027 | 0.001 | 0     | 0.002 | 0.31 | 2.7 | 0.36 | 0    | 0   |
| 13-14        | 0.024 | 0.004 | 0.027 | 0.001 | 0     | 0.004 | 0.29 | 2.7 | 0.36 | 0    | 0   |
| <b>YS-37</b> |       |       |       |       |       |       |      |     |      |      |     |
| 0-1          | 0.060 | 0.004 | 0.027 | 0.002 | 0.033 | 0.005 | 0.62 | 2.7 | 0.36 | 336  | 64  |
| 1-2          | 0.064 | 0.003 | 0.023 | 0.001 | 0.041 | 0.003 | 0.57 | 2.7 | 0.36 | 479  | 73  |
| 2-3          | 0.063 | 0.003 | 0.023 | 0.001 | 0.040 | 0.004 | 0.54 | 2.7 | 0.36 | 491  | 78  |
| 3-4          | 0.056 | 0.005 | 0.031 | 0.002 | 0.025 | 0.005 | 0.53 | 2.7 | 0.36 | 312  | 74  |
| 4-5          | 0.049 | 0.005 | 0.024 | 0.001 | 0.026 | 0.005 | 0.51 | 2.7 | 0.36 | 339  | 80  |
| 5-6          | 0.053 | 0.004 | 0.020 | 0.001 | 0.032 | 0.005 | 0.46 | 2.7 | 0.36 | 478  | 93  |
| 6-7          | 0.045 | 0.002 | 0.024 | 0.001 | 0.021 | 0.003 | 0.43 | 2.7 | 0.36 | 331  | 60  |
| 7-8          | 0.037 | 0.004 | 0.027 | 0.002 | 0.011 | 0.004 | 0.43 | 2.7 | 0.36 | 162  | 72  |
| 8-9          | 0.040 | 0.004 | 0.024 | 0.001 | 0.016 | 0.004 | 0.39 | 2.7 | 0.36 | 261  | 77  |
| 9-10         | 0.036 | 0.002 | 0.025 | 0.001 | 0.011 | 0.002 | 0.36 | 2.7 | 0.36 | 189  | 48  |
| 10-11        | 0.037 | 0.003 | 0.027 | 0.001 | 0.010 | 0.003 | 0.36 | 2.7 | 0.36 | 179  | 62  |
| 11-12        | 0.027 | 0.005 | 0.024 | 0.001 | 0.003 | 0.005 | 0.35 | 2.7 | 0.36 | 44.3 | 82  |
| 12-13        | 0.036 | 0.005 | 0.022 | 0.002 | 0.014 | 0.005 | 0.36 | 2.7 | 0.36 | 239  | 93  |
| 13-14        | 0.033 | 0.003 | 0.026 | 0.001 | 0.007 | 0.003 | 0.36 | 2.7 | 0.36 | 116  | 50  |
| 14-15        | 0.028 | 0.004 | 0.028 | 0.002 | 0.001 | 0.004 | 0.37 | 2.7 | 0.36 | 10.6 | 68  |
| <b>YS-90</b> |       |       |       |       |       |       |      |     |      |      |     |
| 0-1          | 0.074 | 0.01  | 0.027 | 0.002 | 0.048 | 0.011 | 0.76 | 2.7 | 0.36 | 315  | 82  |
| 1-2          | 0.053 | 0.01  | 0.029 | 0.001 | 0.024 | 0.008 | 0.66 | 2.7 | 0.36 | 222  | 77  |
| 2-3          | 0.052 | 0.01  | 0.031 | 0.001 | 0.021 | 0.008 | 0.61 | 2.7 | 0.36 | 225  | 90  |
| 3-4          | 0.048 | 0.01  | 0.030 | 0.001 | 0.018 | 0.008 | 0.58 | 2.7 | 0.36 | 206  | 96  |
| 4-5          | 0.039 | 0.01  | 0.027 | 0.001 | 0.012 | 0.007 | 0.55 | 2.7 | 0.36 | 141  | 91  |
| 5-6          | 0.035 | 0.004 | 0.024 | 0.001 | 0.011 | 0.004 | 0.53 | 2.7 | 0.36 | 135  | 58  |
| 6-7          | 0.040 | 0.01  | 0.025 | 0.001 | 0.015 | 0.007 | 0.50 | 2.7 | 0.36 | 204  | 100 |
| 7-8          | 0.032 | 0.01  | 0.025 | 0.001 | 0.007 | 0.007 | 0.44 | 2.7 | 0.36 | 108  | 100 |
| 8-9          | 0.028 | 0.01  | 0.023 | 0.001 | 0.006 | 0.006 | 0.39 | 2.7 | 0.36 | 92.7 | 110 |
| 9-10         | 0.020 | 0.01  | 0.025 | 0.001 | 0     | 0.007 | 0.37 | 2.7 | 0.36 | 0    | 0   |
| 10-11        | 0.024 | 0.01  | 0.024 | 0.001 | 0.000 | 0.006 | 0.36 | 2.7 | 0.36 | 0    | 0   |
| 11-12        | 0.024 | 0.01  | 0.023 | 0.001 | 0.001 | 0.007 | 0.37 | 2.7 | 0.36 | 0    | 0   |
| 12-13        | 0.021 | 0.01  | 0.024 | 0.001 | 0     | 0.006 | 0.34 | 2.7 | 0.36 | 0    | 0   |
| 13-14        | 0.019 | 0.01  | 0.022 | 0.001 | 0     | 0.007 | 0.35 | 2.7 | 0.36 | 0    | 0   |
| 14-15        | 0.020 | 0.004 | 0.022 | 0.001 | 0     | 0.004 | 0.34 | 2.7 | 0.36 | 0    | 0   |
| 15-16        | 0.021 | 0.01  | 0.022 | 0.001 | 0     | 0.006 | 0.35 | 2.7 | 0.36 | 0    | 0   |

|                           |       |       |       |       |       |       |      |     |      |      |     |
|---------------------------|-------|-------|-------|-------|-------|-------|------|-----|------|------|-----|
| 16-17                     | 0.025 | 0.01  | 0.023 | 0.001 | 0.001 | 0.007 | 0.36 | 2.7 | 0.36 | 0    | 0   |
| <b>YS-93</b>              |       |       |       |       |       |       |      |     |      |      |     |
| 0-1                       | 0.109 | 0.004 | 0.070 | 0.003 | 0.038 | 0.005 | 0.71 | 2.7 | 0.36 | 297  | 55  |
| 1-2                       | 0.113 | 0.005 | 0.056 | 0.003 | 0.057 | 0.006 | 0.63 | 2.7 | 0.36 | 574  | 96  |
| 2-3                       | 0.101 | 0.003 | 0.056 | 0.002 | 0.045 | 0.004 | 0.59 | 2.7 | 0.36 | 502  | 78  |
| 3-4                       | 0.092 | 0.004 | 0.049 | 0.003 | 0.043 | 0.005 | 0.58 | 2.7 | 0.36 | 486  | 83  |
| 4-5                       | 0.076 | 0.006 | 0.038 | 0.004 | 0.038 | 0.007 | 0.53 | 2.7 | 0.36 | 479  | 110 |
| 5-6                       | 0.082 | 0.005 | 0.048 | 0.003 | 0.034 | 0.006 | 0.49 | 2.7 | 0.36 | 468  | 100 |
| 6-7                       | 0.055 | 0.003 | 0.055 | 0.002 | 0     | 0.004 | 0.46 | 2.7 | 0.36 | 2.66 | 55  |
| 7-8                       | 0.061 | 0.005 | 0.039 | 0.004 | 0.022 | 0.006 | 0.46 | 2.7 | 0.36 | 316  | 100 |
| 8-9                       | 0.065 | 0.003 | 0.045 | 0.002 | 0.020 | 0.004 | 0.45 | 2.7 | 0.36 | 295  | 74  |
| 9-10                      | 0.061 | 0.005 | 0.035 | 0.004 | 0.026 | 0.007 | 0.44 | 2.7 | 0.36 | 393  | 120 |
| 10-11                     | 0.053 | 0.005 | 0.037 | 0.003 | 0.016 | 0.006 | 0.43 | 2.7 | 0.36 | 252  | 92  |
| 11-12                     | 0.046 | 0.004 | 0.039 | 0.002 | 0.007 | 0.004 | 0.42 | 2.7 | 0.36 | 104  | 68  |
| 12-13                     | 0.057 | 0.004 | 0.050 | 0.003 | 0.008 | 0.005 | 0.41 | 2.7 | 0.36 | 125  | 74  |
| 13-14                     | 0.057 | 0.003 | 0.043 | 0.002 | 0.014 | 0.004 | 0.42 | 2.7 | 0.36 | 218  | 63  |
| <b>YS-98</b>              |       |       |       |       |       |       |      |     |      |      |     |
| 0-1                       | 0.046 | 0.02  | 0.024 | 0.006 | 0.022 | 0.016 | 0.92 | 2.7 | 0.36 | 44.6 | 34  |
| 1-2                       | 0.086 | 0.01  | 0.039 | 0.002 | 0.046 | 0.008 | 0.67 | 2.7 | 0.36 | 408  | 87  |
| 2-3                       | 0.083 | 0.00  | 0.046 | 0.002 | 0.037 | 0.005 | 0.58 | 2.7 | 0.36 | 415  | 77  |
| 3-4                       | 0.073 | 0.01  | 0.040 | 0.002 | 0.034 | 0.007 | 0.54 | 2.7 | 0.36 | 423  | 110 |
| 4-5                       | 0.061 | 0.01  | 0.038 | 0.003 | 0.024 | 0.007 | 0.52 | 2.7 | 0.36 | 307  | 100 |
| 5-6                       | 0.080 | 0.01  | 0.039 | 0.002 | 0.041 | 0.007 | 0.47 | 2.7 | 0.36 | 588  | 130 |
| 6-7                       | 0.037 | 0.01  | 0.033 | 0.002 | 0.004 | 0.007 | 0.44 | 2.7 | 0.36 | 55.2 | 110 |
| 7-8                       | 0.043 | 0.00  | 0.032 | 0.001 | 0.011 | 0.004 | 0.43 | 2.7 | 0.36 | 169  | 72  |
| 8-9                       | 0.043 | 0.01  | 0.028 | 0.002 | 0.015 | 0.007 | 0.41 | 2.7 | 0.36 | 235  | 120 |
| 9-10                      | 0.032 | 0.01  | 0.030 | 0.002 | 0.003 | 0.008 | 0.42 | 2.7 | 0.36 | 41.2 | 120 |
| 10-11                     | 0.039 | 0.00  | 0.032 | 0.001 | 0.007 | 0.004 | 0.41 | 2.7 | 0.36 | 114  | 72  |
| 11-12                     | 0.032 | 0.01  | 0.032 | 0.003 | 0.000 | 0.007 | 0.40 | 2.7 | 0.36 | 0    | 110 |
| <b>YS-120</b>             |       |       |       |       |       |       |      |     |      |      |     |
| 0-1                       | 0.117 | 0.007 | 0.040 | 0.003 | 0.076 | 0.007 | 0.71 | 2.7 | 0.36 | 608  | 99  |
| 1-2                       | 0.133 | 0.005 | 0.044 | 0.001 | 0.089 | 0.005 | 0.64 | 2.7 | 0.36 | 860  | 130 |
| 2-3                       | 0.120 | 0.005 | 0.043 | 0.001 | 0.076 | 0.005 | 0.61 | 2.7 | 0.36 | 807  | 120 |
| 3-4                       | 0.109 | 0.003 | 0.051 | 0.001 | 0.058 | 0.003 | 0.60 | 2.7 | 0.36 | 632  | 91  |
| 4-5                       | 0.112 | 0.007 | 0.054 | 0.002 | 0.059 | 0.008 | 0.59 | 2.7 | 0.36 | 645  | 120 |
| 5-6                       | 0.121 | 0.008 | 0.051 | 0.003 | 0.070 | 0.008 | 0.60 | 2.7 | 0.36 | 764  | 130 |
| 6-7                       | 0.121 | 0.008 | 0.049 | 0.002 | 0.072 | 0.008 | 0.60 | 2.7 | 0.36 | 783  | 140 |
| 7-8                       | 0.124 | 0.005 | 0.054 | 0.002 | 0.069 | 0.005 | 0.59 | 2.7 | 0.36 | 761  | 120 |
| 8-9                       | 0.127 | 0.007 | 0.060 | 0.003 | 0.067 | 0.008 | 0.58 | 2.7 | 0.36 | 766  | 140 |
| 9-10                      | 0.126 | 0.007 | 0.060 | 0.002 | 0.067 | 0.008 | 0.55 | 2.7 | 0.36 | 811  | 140 |
| 10-11                     | 0.102 | 0.008 | 0.057 | 0.002 | 0.044 | 0.008 | 0.51 | 2.7 | 0.36 | 583  | 130 |
| <b>IK-105<sup>1</sup></b> |       |       |       |       |       |       |      |     |      |      |     |
| 0-1                       | 0.194 | 0.014 | 0.060 | 0.010 | 0.134 | 0.017 | 0.7  | 2.7 | 0.36 | 1090 | 200 |
| 2-3                       | 0.061 | 0.011 | 0.035 | 0.007 | 0.026 | 0.013 | 0.6  | 2.7 | 0.36 | 285  | 140 |
| 4-5                       | 0.068 | 0.013 | 0.041 | 0.012 | 0.027 | 0.018 | 0.6  | 2.7 | 0.36 | 289  | 200 |
| 5-6                       | 0.096 | 0.006 | 0.005 | 0.004 | 0.091 | 0.007 | 0.6  | 2.7 | 0.36 | 981  | 150 |
| 6-7                       | 0.071 | 0.013 | 0.025 | 0.008 | 0.046 | 0.015 | 0.6  | 2.7 | 0.36 | 496  | 170 |
| 9-10                      | 0.053 | 0.015 | 0.034 | 0.009 | 0.019 | 0.017 | 0.6  | 2.7 | 0.36 | 202  | 190 |

|               |       |       |       |       |       |       |     |     |      |      |     |
|---------------|-------|-------|-------|-------|-------|-------|-----|-----|------|------|-----|
| 14-15         | 0.060 | 0.007 | 0.006 | 0.005 | 0.054 | 0.009 | 0.6 | 2.7 | 0.36 | 588  | 120 |
| 16-17         | 0.038 | 0.011 | 0.053 | 0.008 | 0     | 0.013 | 0.6 | 2.7 | 0.36 | 0    | 0   |
| 24-25         | 0.067 | 0.008 | 0.020 | 0.006 | 0.047 | 0.009 | 0.6 | 2.7 | 0.36 | 504  | 120 |
| <b>IK-110</b> |       |       |       |       |       |       |     |     |      |      |     |
| 0-1           | 0.013 | 0.005 | 0.003 | 0.004 | 0.010 | 0.006 | 0.7 | 2.7 | 0.36 | 80.8 | 49  |
| 1-2           | 0.010 | 0.004 | 0.017 | 0.004 | 0     | 0.006 | 0.6 | 2.7 | 0.36 | 0    | 0   |
| 2-3           | 0.027 | 0.004 | 0.033 | 0.004 | 0     | 0.006 | 0.6 | 2.7 | 0.36 | 0    | 0   |
| 3-4           | 0.017 | 0.003 | 0.035 | 0.002 | 0     | 0.004 | 0.6 | 2.7 | 0.36 | 0    | 0   |
| 4-5           | 0.038 | 0.006 | 0.009 | 0.005 | 0.029 | 0.008 | 0.6 | 2.7 | 0.36 | 312  | 97  |
| 6-7           | 0.023 | 0.004 | 0.011 | 0.004 | 0.012 | 0.005 | 0.6 | 2.7 | 0.36 | 128  | 60  |
| 7-8           | 0.000 | 0.004 | 0.013 | 0.004 | 0     | 0.005 | 0.6 | 2.7 | 0.36 | 0    | 0   |
| 12-13         | 0.002 | 0.004 | 0.022 | 0.004 | 0     | 0.006 | 0.6 | 2.7 | 0.36 | 0    | 0   |
| <b>IK-114</b> |       |       |       |       |       |       |     |     |      |      |     |
| 0-5           | 0.028 | 0.003 | 0.019 | 0.003 | 0.009 | 0.004 | 0.7 | 2.7 | 0.36 | 72.8 | 31  |
| 9-15          | 0.031 | 0.003 | 0.018 | 0.003 | 0.013 | 0.004 | 0.6 | 2.7 | 0.36 | 140  | 47  |
| 10-15         | 0.031 | 0.003 | 0.022 | 0.004 | 0.009 | 0.005 | 0.6 | 2.7 | 0.36 | 100  | 53  |
| 15-22         | 0.032 | 0.002 | 0.018 | 0.002 | 0.015 | 0.003 | 0.6 | 2.7 | 0.36 | 157  | 36  |
| 20-25         | 0.027 | 0.001 | 0.024 | 0.001 | 0.002 | 0.002 | 0.6 | 2.7 | 0.36 | 23.2 | 21  |
| 27-30         | 0.030 | 0.002 | 0.019 | 0.001 | 0.011 | 0.002 | 0.6 | 2.7 | 0.36 | 114  | 28  |
| 30-35         | 0.031 | 0.002 | 0.025 | 0.001 | 0.006 | 0.002 | 0.6 | 2.7 | 0.36 | 67.2 | 25  |
| 35-40         | 0.032 | 0.002 | 0.016 | 0.001 | 0.016 | 0.003 | 0.6 | 2.7 | 0.36 | 170  | 36  |
| <b>IK-118</b> |       |       |       |       |       |       |     |     |      |      |     |
| 0-5.5         | 0.125 | 0.009 | 0.067 | 0.009 | 0.058 | 0.013 | 0.7 | 2.7 | 0.36 | 473  | 120 |
| 5-10          | 0.131 | 0.010 | 0.030 | 0.008 | 0.101 | 0.013 | 0.6 | 2.7 | 0.36 | 1090 | 200 |
| 10-15         | 0.052 | 0.007 | 0.062 | 0.007 | 0     | 0.010 | 0.6 | 2.7 | 0.36 | 0    | 0   |
| 15-20         | 0.044 | 0.007 | 0.000 | 0.000 | 0.044 | 0.007 | 0.6 | 2.7 | 0.36 | 480  | 98  |
| 20-25         | 0.066 | 0.008 | 0.013 | 0.009 | 0.054 | 0.012 | 0.6 | 2.7 | 0.36 | 578  | 160 |
| 25-30         | 0.070 | 0.012 | 0.046 | 0.013 | 0.023 | 0.018 | 0.6 | 2.7 | 0.36 | 250  | 190 |
| 30-35         | 0.099 | 0.012 | 0.047 | 0.011 | 0.052 | 0.017 | 0.6 | 2.7 | 0.36 | 558  | 190 |
| 35-40         | 0.061 | 0.004 | 0.000 | 0.000 | 0.061 | 0.004 | 0.6 | 2.7 | 0.36 | 662  | 99  |
| 40-45         | 0.074 | 0.009 | 0.020 | 0.009 | 0.055 | 0.012 | 0.6 | 2.7 | 0.36 | 589  | 160 |
| 45-50         | 0.073 | 0.005 | 0.028 | 0.005 | 0.045 | 0.007 | 0.6 | 2.7 | 0.36 | 488  | 100 |
| 50-55         | 0.113 | 0.005 | 0.051 | 0.006 | 0.063 | 0.008 | 0.6 | 2.7 | 0.36 | 679  | 120 |
| 55-58         | 0.069 | 0.008 | 0.025 | 0.006 | 0.044 | 0.010 | 0.6 | 2.7 | 0.36 | 476  | 130 |

<sup>1</sup> Only 9cm of the 25cm core has been counted, so a correction factor of 2.8 has been used when calculating the total <sup>210</sup>Pb<sub>xs</sub> (Bq/m<sup>2</sup>/yr).
